# Supplementary material for: Global Frequency Analyses of Canine Progressive Rod-Cone Degeneration–Progressive Retinal Atrophy and Collie Eye Anomaly Using Commercial Genetic Testing Data
Source: MDPI journal article supplement (doi:10.3390/genes14112093), 2023-11-17
Supplement: s1 [file s1]

## Supplementary Figures and Tables

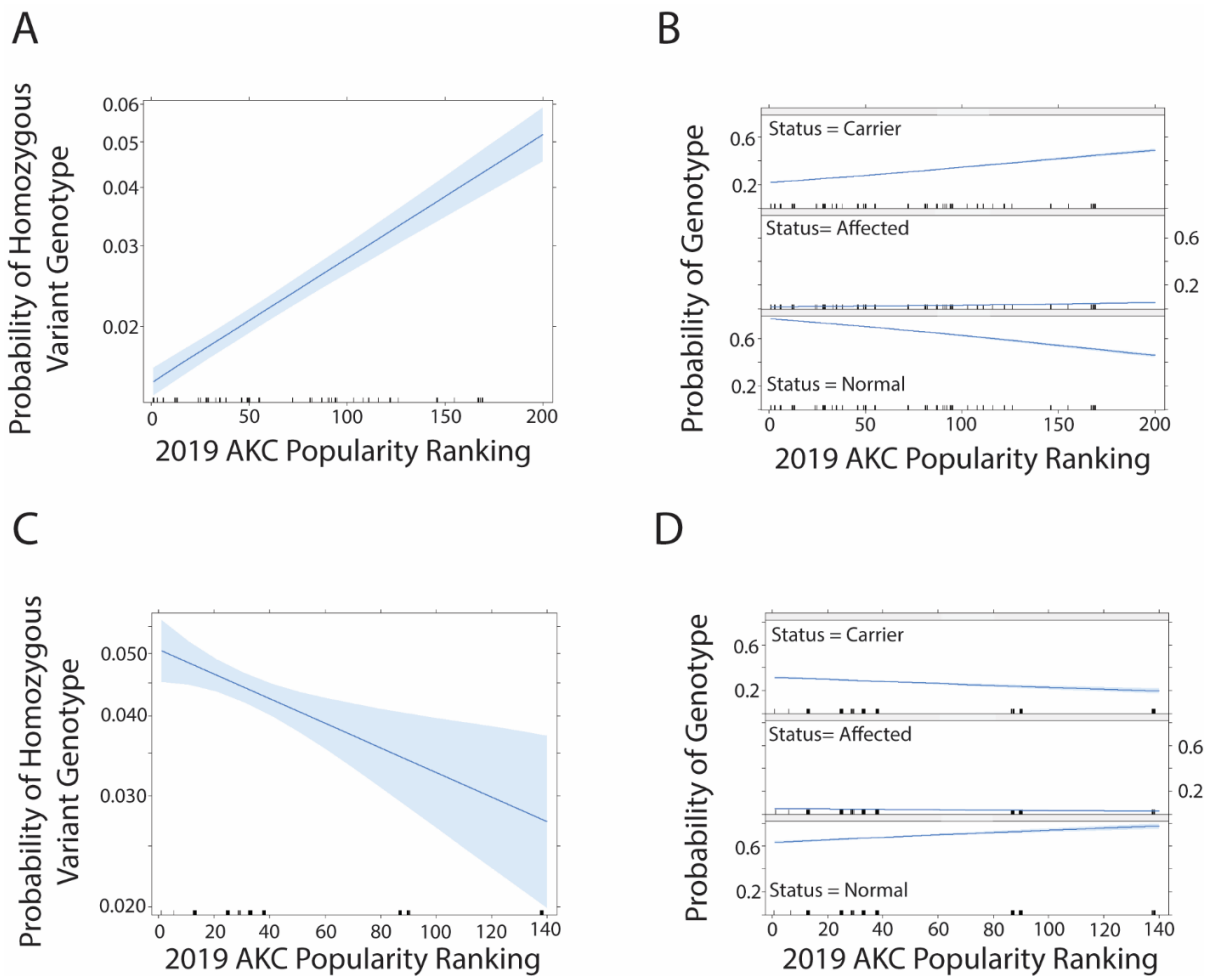

Figure S1. Effect of breed popularity according to AKC ranking by number of new 2019 registrations (actual counts not provided) the probability of prcd-PRA and CEA genotypes in model including breed rank and year. Blue shading indicates 95% confidence interval. (A) Effect of breed rank in LRM model for prcd-PRA, (B) effect of breed rank in MRM model for prcd-PRA, (C) effect of breed rank in LRM model for CEA, (D) effect of breed rank in MRM model for CEA

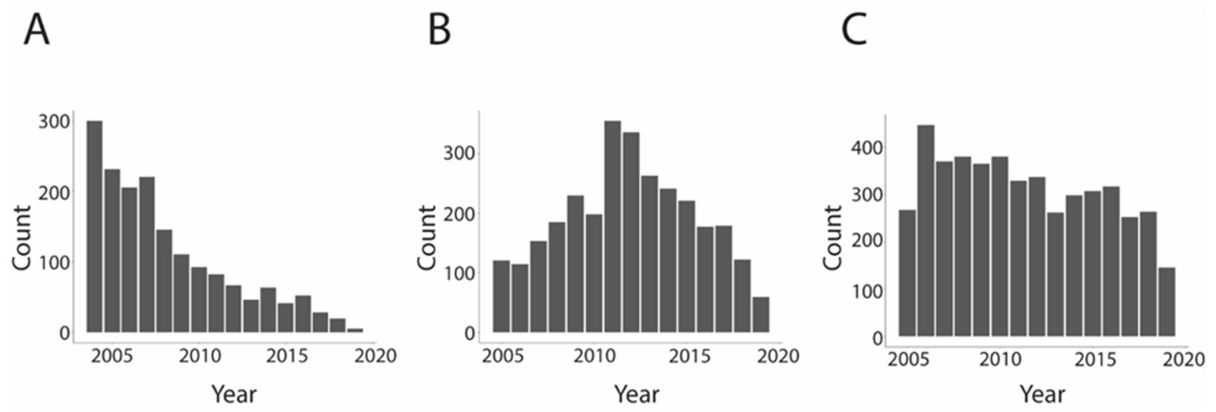

Figure S2. Examples of breed-specific test count distribution. (A) American Eskimo Dog prcd-PRA tests, (B) Shetland Sheepdog CEA tests, (C) Portuguese Water Dog prcd-PRA tests

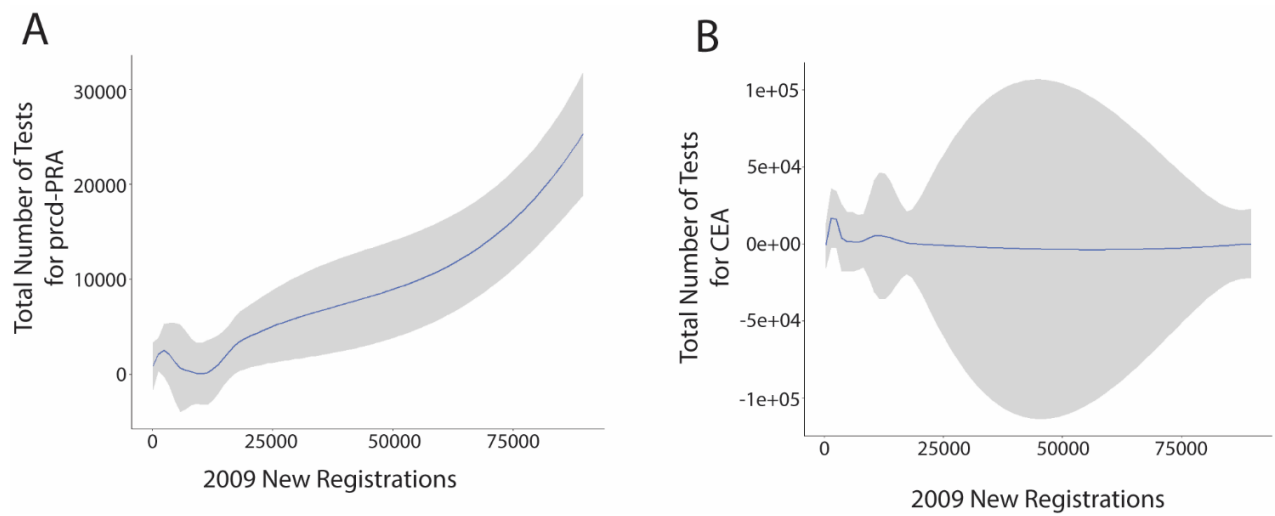

Figure S3. Correlation between breed size according to number of 2009 new AKC registered dogs and test uptake as LOESS curve. Gray shading indicates 95% confidence interval. (A) prcd-PRA, (B) CEA

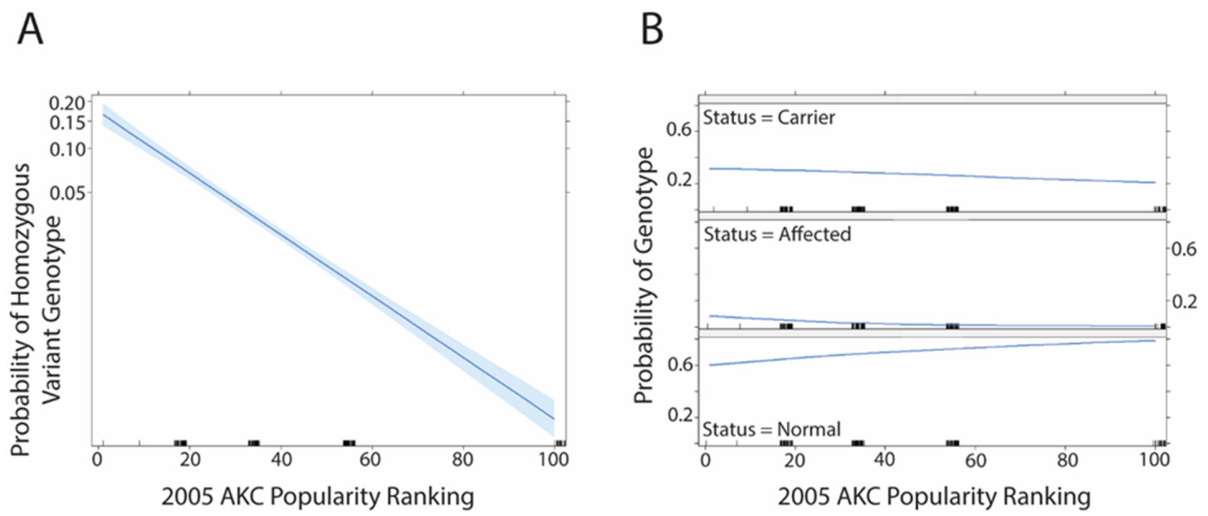

Figure S4. Effect of breed popularity according to AKC ranking by number of new 2005 registrations on probability of CEA genotypes in model including breed rank and year, without Collies included. Blue shading indicates 95% confidence interval. (A) Effect of breed rank in LRM model, (B) effect of breed rank in MRM model

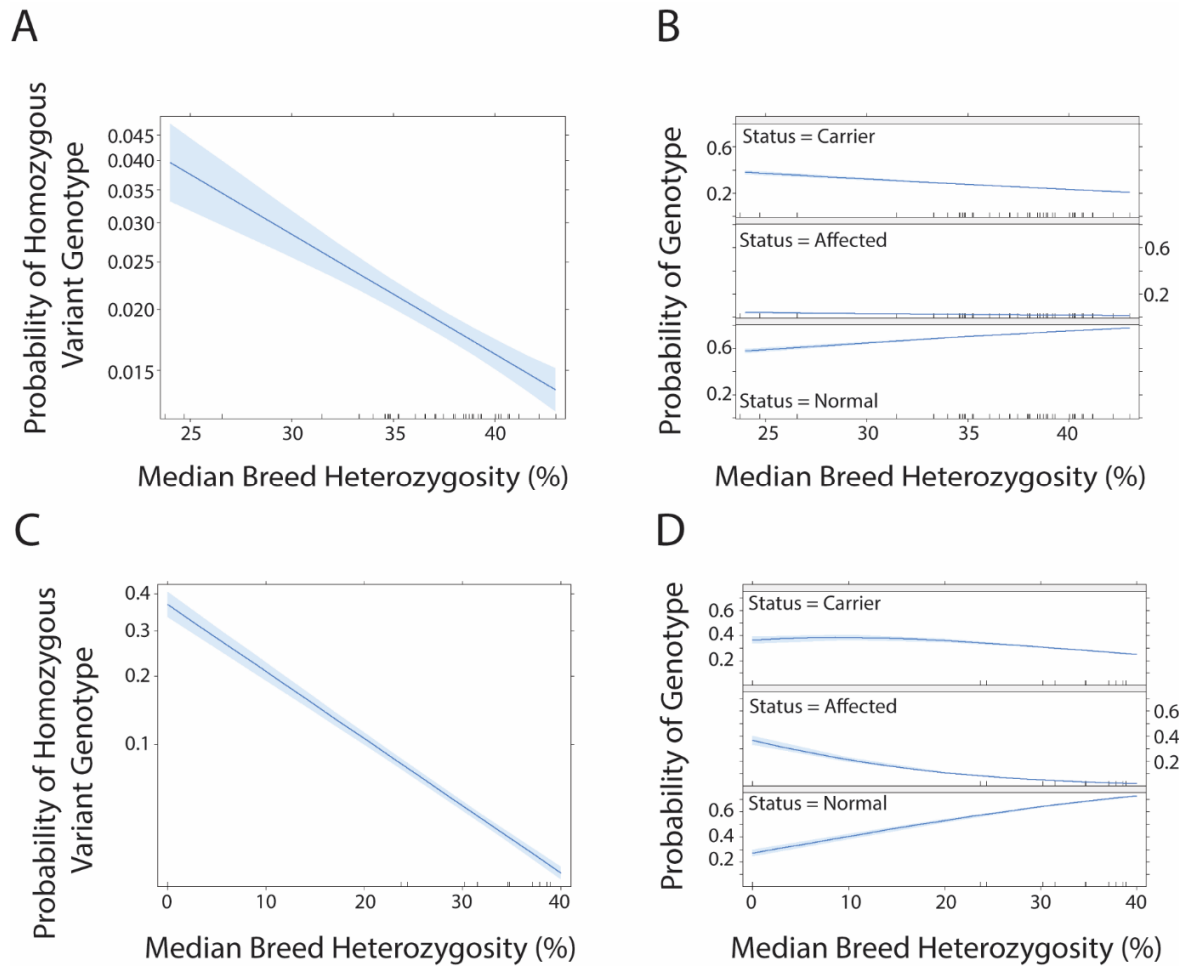

Figure S5. Effect of median breed percentage heterozygosity on probability of disease genotypes in models including median breed percentage heterozygosity and year. Blue shading indicates 95% confidence interval. (A) Effect of heterozygosity on prcd-PRA in LRM model, (B) effect of heterozygosity on prcd-PRA in MRM model, (C) effect of heterozygosity on CEA in LRM model, (D) effect of heterozygosity on CEA in MRM model

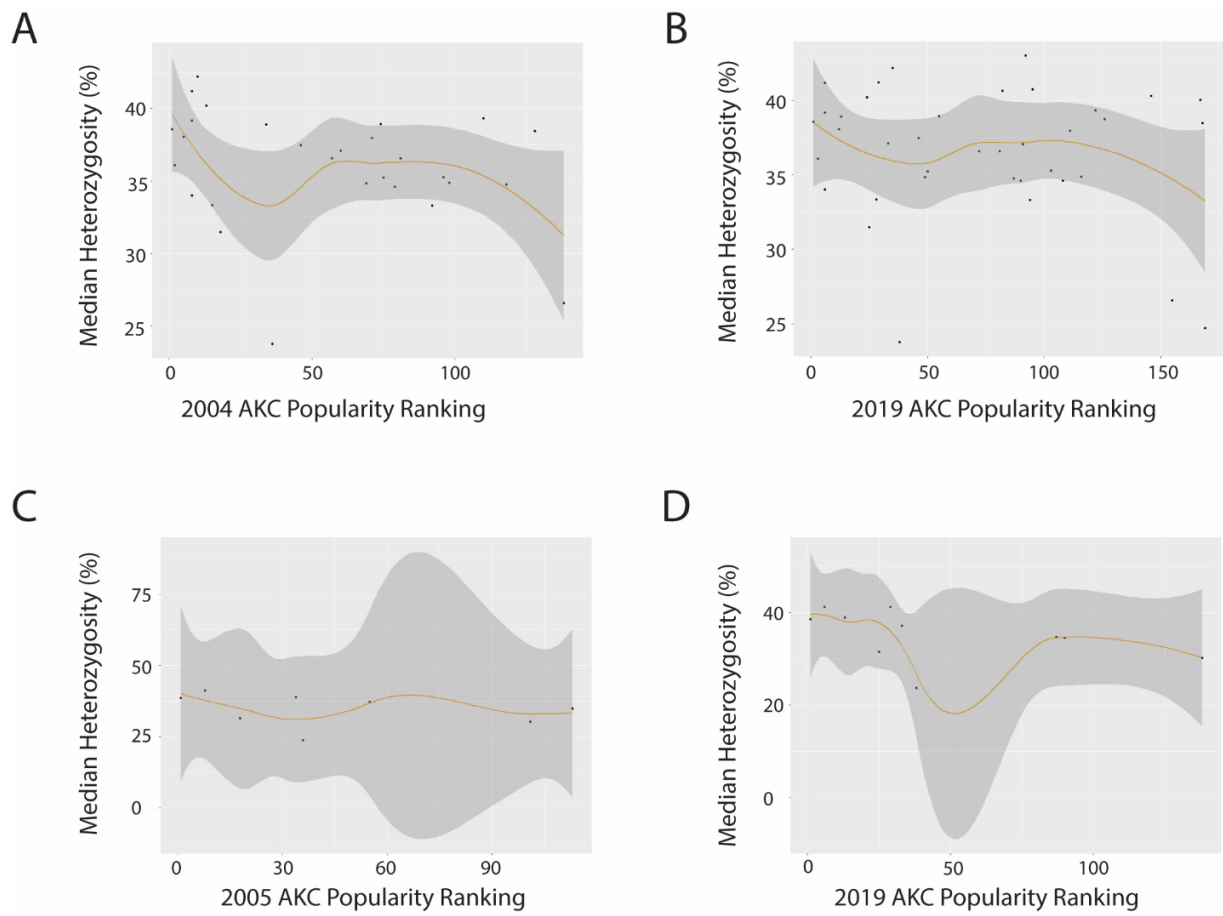

Figure S6. Correlation between breed popularity percentage median breed heterozygosity as LOESS curve. Gray shading indicates 95% confidence interval. (A) prcd-PRA with 2004 breed rankings, (B) prcd-PRA with 2019 breed rankings, (C) CEA with 2004 breed rankings, (D) CEA with 2019 breed rankings

Table S1. Summary of dog breeds with presence of prcd-PRA causal *PRCD* variant

| Causal <i>PRCD</i> variant present in current dataset | Breed                             | Literature Reference | Online Reference <sup>1</sup>                    |
|-------------------------------------------------------|-----------------------------------|----------------------|--------------------------------------------------|
| √                                                     | American Cocker Spaniel           | [10]                 |                                                  |
| √                                                     | American Eskimo Dog               | [11]                 |                                                  |
|                                                       | American Hairless Terrier         |                      | Pawprint <sup>2</sup> , MyBreedData <sup>6</sup> |
| √                                                     | Australian Cattle Dog             | [11]                 |                                                  |
|                                                       | Australian Cobberdog              |                      | UCDavis <sup>3</sup>                             |
|                                                       | Australian Koolie                 |                      | Pawprint <sup>2</sup>                            |
|                                                       | Australian Labradoodle            |                      | UCDavis <sup>3</sup> , MyBreedData <sup>6</sup>  |
| √                                                     | Australian Shepherd               | [11]                 |                                                  |
| √                                                     | Australian Shepherd, Miniature    | [11]                 | Pawprint <sup>2</sup>                            |
| √                                                     | Australian Shepherd, Toy          |                      | Pawprint <sup>2</sup>                            |
| √                                                     | Australian Stumpy Tail Cattle Dog | [11]                 |                                                  |
| √                                                     | Barbet                            |                      | Pawprint <sup>2</sup> , MyBreedData <sup>6</sup> |
|                                                       | Berger d'Auvergne                 |                      | MyBreedData <sup>6</sup>                         |
|                                                       | Bichon Frise                      | [12]                 |                                                  |
|                                                       | Biewer Terrier                    | [13]                 |                                                  |
|                                                       | Black Russian Terrier             | [13]                 |                                                  |
| √                                                     | Bolognese                         | [13]                 |                                                  |
| √                                                     | Bolonka Zwetna                    | [15]                 |                                                  |
|                                                       | Carolina Dog                      |                      | Pawprint <sup>2</sup>                            |
|                                                       | Cavalier King Charles Spaniel     |                      | Pawprint <sup>2</sup>                            |
| √                                                     | Chesapeake Bay Retriever          | [10]                 |                                                  |
|                                                       | Chihuahua                         | [14]                 |                                                  |
| √                                                     | Chinese Crested                   | [10]                 |                                                  |
| √                                                     | Coton de Tulear                   | [13]                 |                                                  |
|                                                       | Dalmatian                         | [12]                 |                                                  |
| √                                                     | Dwarf Poodle                      | [11]                 |                                                  |
| √                                                     | English Cocker Spaniel            | [10]                 |                                                  |
|                                                       | English Shepherd                  | [15]                 |                                                  |
| √                                                     | Entlebucher Mountain Dog          | [11]                 |                                                  |
|                                                       | Field Spaniel                     | [13]                 |                                                  |
| √                                                     | Finnish Lapphund                  | [11]                 |                                                  |
|                                                       | German Spitz                      |                      | UCDavis <sup>3</sup>                             |
| √                                                     | Giant Schnauzer                   | [15]                 |                                                  |
| √                                                     | Golden Retriever                  | [11]                 |                                                  |
|                                                       | Havanese                          |                      | MyBreedData <sup>6</sup>                         |
|                                                       | Jack Russell Terrier              | [13]                 |                                                  |
|                                                       | Japanese Chin                     | [13]                 |                                                  |
|                                                       | Kai Ken                           | [12]                 |                                                  |
| √                                                     | Karelian Bear Dog                 | [11]                 |                                                  |
|                                                       | Kerry Blue Terrier                |                      | MyBreedData <sup>6</sup>                         |
|                                                       | Koolie                            |                      | Pawprint <sup>2</sup>                            |
| √                                                     | Kuvasz                            | [11]                 |                                                  |
| √                                                     | Labrador Retriever                | [10]                 |                                                  |
|                                                       | Lagotto Romagnolo                 | [13]                 |                                                  |
|                                                       | Lancashire Heeler                 | [13]                 |                                                  |
| √                                                     | Lapponian Herder                  | [11]                 |                                                  |
|                                                       | Maltese                           |                      | MyBreedData <sup>6</sup>                         |
|                                                       | Manchester Terrier – Toy          | [13]                 |                                                  |
|                                                       | Markiesje                         | [11]                 |                                                  |
|                                                       | Mi-Ki                             | [13]                 |                                                  |

|   |                                    |      |                                                                                            |
|---|------------------------------------|------|--------------------------------------------------------------------------------------------|
| ✓ | Miniature American Shepherd        |      | OFA <sup>4</sup>                                                                           |
| ✓ | Miniature Poodle                   | [10] |                                                                                            |
| ✓ | Moyen/Klein Poodle                 | [11] |                                                                                            |
|   | Norrbottenspitz                    | [13] |                                                                                            |
| ✓ | Norwegian Elkhound                 | [11] |                                                                                            |
| ✓ | Nova Scotia Duck Tolling Retriever | [10] |                                                                                            |
|   | Plott                              | [13] |                                                                                            |
|   | Pomeranian                         | [13] |                                                                                            |
| ✓ | Poodle                             | [15] |                                                                                            |
|   | Portuguese Podengo – Miniature     | [13] |                                                                                            |
| ✓ | Portuguese Water dog               | [10] |                                                                                            |
|   | Puli                               | [13] |                                                                                            |
|   | Pyrenean Sheepdog                  |      | MyBreedData <sup>6</sup>                                                                   |
|   | Rat Terrier                        |      | Pawprint <sup>2</sup> , OFA <sup>4</sup> ,<br>MyBreedData <sup>6</sup>                     |
|   | Russian-European Laika             | [13] |                                                                                            |
|   | Sarplaninac                        |      | MyBreedData <sup>6</sup>                                                                   |
| ✓ | Schipperke                         | [10] |                                                                                            |
|   | Schnauzer (Miniature)              | [12] |                                                                                            |
|   | Serbian Hound                      | [13] |                                                                                            |
| ✓ | Silky Terrier                      |      | OMIA <sup>5</sup> , Pawprint <sup>2</sup> , OFA <sup>4</sup> ,<br>MyBreedData <sup>6</sup> |
| ✓ | Spanish Water Dog                  | [11] |                                                                                            |
|   | Swedish Jamthund                   |      | UCDavis <sup>3</sup>                                                                       |
| ✓ | Swedish Lapphund                   | [11] |                                                                                            |
|   | Tibetan Terrier                    | [13] |                                                                                            |
|   | Toy Fox Terrier                    |      | Pawprint <sup>2</sup>                                                                      |
| ✓ | Toy Poodle                         | [10] |                                                                                            |
|   | Xoloitzcuintle                     | [13] |                                                                                            |
| ✓ | Yorkshire Terrier                  | [11] |                                                                                            |

<sup>1</sup>Online references included for breeds for which the variant was not identified in published scientific literature

<sup>2</sup> <https://www.pawprintgenetics.com/products/tests/details/89/> (Accessed 2/13/2023)

<sup>3</sup> <https://vgl.ucdavis.edu/test/pra-prcd> (Accessed 2/22/2023)

<sup>4</sup><https://ofa.org/all-dna-tests/?TEST=PROGRESSIVE%20RETINAL%20ATROPHY> (Accessed 2/13/2023)

<sup>5</sup><https://omia.org/OMIA000218/9615/> (Accessed 2/22/2023)

<sup>6</sup><https://mybreeddata.com/> (accessed 10/2/2023)



Table S2. Summary of dog breeds with presence of CEA-associated *NHEJ1* deletion

| <i>NHEJ1</i> deletion present in current dataset | Breed                              | Literature Reference | Online Reference <sup>1</sup>                                                                                                          |
|--------------------------------------------------|------------------------------------|----------------------|----------------------------------------------------------------------------------------------------------------------------------------|
|                                                  | Alaskan Sled Dog                   | [33]                 |                                                                                                                                        |
|                                                  | Anatolian Shepherd Dog             | [12]                 |                                                                                                                                        |
|                                                  | Australian Kelpie                  | [13]                 |                                                                                                                                        |
| √                                                | Australian Shepherd                | [34]                 |                                                                                                                                        |
| √                                                | Australian Shepherd, Miniature     |                      | OFA <sup>2</sup> , Pawprint <sup>3</sup> , MyBreedData <sup>5</sup>                                                                    |
| √                                                | Bearded Collie                     |                      | OFA <sup>2</sup> , Pawprint <sup>3</sup> , MyBreedData <sup>5</sup>                                                                    |
|                                                  | Belgian Sheepdog                   |                      | MyBreedData <sup>5</sup>                                                                                                               |
| √                                                | Berger d'Auvergne                  |                      | MyBreedData <sup>5</sup> , <a href="https://www.chienbergerdauvergne.org/la-sante/">https://www.chienbergerdauvergne.org/la-sante/</a> |
| √                                                | Border Collie                      | [34]                 |                                                                                                                                        |
| √                                                | Boykin Spaniel                     | [29]                 |                                                                                                                                        |
|                                                  | Chinook                            | [13]                 |                                                                                                                                        |
| √                                                | English Shepherd                   |                      | Pawprint <sup>3</sup>                                                                                                                  |
| √                                                | Hokkaido Dog                       | [35]                 |                                                                                                                                        |
|                                                  | Jack Russell Terrier               | [13]                 |                                                                                                                                        |
|                                                  | Koolie                             | [13]                 |                                                                                                                                        |
|                                                  | Lacy Dog                           | [12]                 |                                                                                                                                        |
| √                                                | Lancashire Heeler                  | [29]                 |                                                                                                                                        |
|                                                  | Lapponian Herder                   | [13]                 |                                                                                                                                        |
| √                                                | Longhaired Whippet                 | [29]                 |                                                                                                                                        |
|                                                  | Maremma Sheepdog                   | [12]                 |                                                                                                                                        |
|                                                  | McNab Dog                          | [12]                 |                                                                                                                                        |
| √                                                | Miniature American Shepherd        |                      | OFA <sup>2</sup> , Pawprint <sup>3</sup>                                                                                               |
| √                                                | Nova Scotia Duck Tolling Retriever | [29]                 |                                                                                                                                        |
|                                                  | Old English Sheepdog               |                      | OMIA <sup>4</sup>                                                                                                                      |
|                                                  | Old-Time Scotch Collie             |                      | Pawprint <sup>3</sup>                                                                                                                  |
|                                                  | Ovelheiro Gaúcho                   |                      | MyBreedData <sup>5</sup>                                                                                                               |
|                                                  | Parson Russell Terrier             | [13]                 |                                                                                                                                        |
|                                                  | Polar Husky                        | [33]                 |                                                                                                                                        |
| √                                                | Rough Collie                       | [34]                 |                                                                                                                                        |
|                                                  | Scottish Collie                    |                      | Pawprint <sup>3</sup>                                                                                                                  |
| √                                                | Shetland Sheepdog                  | [34]                 |                                                                                                                                        |
|                                                  | Siberian Husky                     | [33]                 |                                                                                                                                        |
| √                                                | Silken Windhound                   |                      | OMIA <sup>4</sup> , OFA <sup>2</sup> , Pawprint <sup>3</sup>                                                                           |
|                                                  | Smithfield Collie                  |                      | OMIA <sup>4</sup>                                                                                                                      |
| √                                                | Smooth Collie                      | [34]                 |                                                                                                                                        |
|                                                  | Tamaskan Dog                       | [13]                 |                                                                                                                                        |
|                                                  | Welsh Sheepdog                     |                      | MyBreedData <sup>5</sup>                                                                                                               |
|                                                  | White Swiss Shepherd               |                      | MyBreedData <sup>5</sup>                                                                                                               |

<sup>1</sup>Online references included for breeds for which the variant was not identified in published scientific literature

<sup>2</sup><https://ofa.org/all-dna-tests/?TEST=PROGRESSIVE%20RETINAL%20ATROPHY> (Accessed 2/13/2023)

<sup>3</sup><https://www.pawprintgenetics.com/products/tests/details/92/> (Accessed 2/13/2023)

<sup>4</sup><https://omia.org/OMIA000218/9615/> (Accessed 2/22/2023)

<sup>5</sup><https://mybreeddata.com/> (accessed 10/2/2023)

Table S3. Number of tests for prcd-PRA and CEA according to owner-identified country

| <b>Country</b>         | <b>prcd-PRA</b> | <b>CEA</b> |
|------------------------|-----------------|------------|
| Andorra                | 1               |            |
| Argentina              | 11              | 26         |
| Australia              | 649             | 593        |
| Austria                | 536             | 842        |
| Belarus                |                 | 1          |
| Belgium                | 630             | 920        |
| Bermuda                | 2               |            |
| Bosnia and Herzegovina | 1               |            |
| Bouvet Island          |                 | 1          |
| Brazil                 | 301             | 509        |
| Bulgaria               | 8               | 1          |
| Canada                 | 4543            | 1085       |
| Chile                  | 4               | 3          |
| China                  | 1               |            |
| Colombia               | 1               | 5          |
| Costa Rica             | 4               |            |
| Croatia                | 13              | 34         |
| Cyprus                 | 22              |            |
| Czech Republic         | 335             | 444        |
| Denmark                | 2392            | 613        |
| Dominican Republic     | 1               |            |
| Estonia                | 91              | 4          |
| Faroe Islands          |                 | 83         |
| Finland                | 3786            | 1041       |
| France                 | 3111            | 2565       |
| French Polynesia       | 1               |            |
| Gabon                  | 3               |            |
| Germany                | 5227            | 3793       |
| Gibraltar              | 2               |            |
| Greece                 | 15              | 3          |
| Greenland              | 1               |            |
| Guadeloupe             | 2               |            |
| Hungary                | 192             | 123        |
| Iceland                | 277             | 48         |
| Ireland                | 178             | 842        |
| Israel                 | 34              |            |
| Italy                  | 1014            | 1095       |
| Japan                  | 125             | 42         |
| Kuwait                 |                 | 1          |
| Latvia                 | 18              | 16         |

|                      |       |      |
|----------------------|-------|------|
| Liechtenstein        | 2     | 3    |
| Lithuania            | 14    | 2    |
| Luxembourg           | 31    | 44   |
| Macau                | 1     |      |
| Macedonia            | 2     |      |
| Malta                | 1     | 1    |
| Mexico               | 9     | 3    |
| Netherlands          | 2408  | 1050 |
| Netherlands Antilles | 1     | 1    |
| New Caledonia        | 6     | 3    |
| New Zealand          | 113   | 64   |
| Norfolk Island       |       | 1    |
| Norway               | 2484  | 548  |
| Oman                 | 1     |      |
| Panama               | 1     |      |
| Paraguay             | 2     |      |
| Peru                 |       | 9    |
| Poland               | 297   | 227  |
| Portugal             | 66    | 27   |
| Puerto Rico          | 2     |      |
| Qatar                | 1     |      |
| Reunion              | 19    | 16   |
| Romania              | 20    | 2    |
| Russia               | 268   | 55   |
| Serbia-Montenegro    | 13    | 4    |
| Singapore            | 1     | 1    |
| Slovakia             | 70    | 43   |
| Slovenia             | 33    | 48   |
| South Africa         | 166   | 20   |
| South Korea          | 5     |      |
| Spain                | 260   | 246  |
| Sweden               | 7501  | 1077 |
| Switzerland          | 936   | 1175 |
| Taiwan               | 2     |      |
| Thailand             | 2     |      |
| Trinidad and Tobago  | 1     |      |
| Turkey               |       | 9    |
| Ukraine              | 17    | 1    |
| United Kingdom       | 13254 | 7198 |
| Uruguay              | 14    | 1    |
| USA                  | 35111 | 7221 |
| Zimbabwe             |       | 1    |

---

Table S4. Number of tests for prcd-PRA and CEA according to owner-identified breed or breed mix

| <b>Breed/Mix</b>                  | <b>prcd-PRA</b> | <b>CEA</b> |
|-----------------------------------|-----------------|------------|
| American Eskimo Dog               | 1704            |            |
| American Hairless (Rat) Terrier   | 1               |            |
| Australian Cattle Dog             | 3798            |            |
| Australian Cobberdog              | 1               |            |
| Australian Shepherd               | 1636            | 3234       |
| Australian Shepherd, Miniature    | 474             | 392        |
| Australian Shepherd, Toy          | 76              | 26         |
| Australian Stumpy Tail Cattle Dog | 59              |            |
| Barbet                            | 21              |            |
| Bearded Collie                    |                 | 355        |
| Berger d'Auvergne                 |                 | 9          |
| Black Russian Terrier             | 2               |            |
| Bolognese                         | 36              |            |
| Bolonka Zwetna                    | 53              |            |
| Border Collie                     | 1               | 20588      |
| Boykin Spaniel                    | 1               | 167        |
| Chesapeake Bay Retriever          | 1009            |            |
| Chihuahua                         | 9               |            |
| Chinese Crested                   | 1844            |            |
| Cockapoo                          | 239             |            |
| Cocker Spaniel (American)         | 664             |            |
| Collie                            | 7               | 3178       |
| Coton de Tulear                   | 5               |            |
| Dwarf Poodle                      | 882             |            |
| English Cocker Spaniel            | 11670           |            |
| English Shepherd                  | 8               | 5          |
| Entlebucher Mountain Dog          | 1206            |            |
| Field Spaniel                     | 1               |            |
| Finnish Lapphund                  | 1938            |            |
| German Spitz                      | 7               |            |
| Giant Schnauzer                   | 107             |            |
| Golden Retriever                  | 4337            |            |
| Goldendoodle                      | 262             |            |
| Hokkaido dog                      |                 | 9          |
| Karelian Bear Dog                 | 9               |            |
| Kuvasz                            | 531             |            |
| Lab/Golden Cross                  | 149             |            |
| Labradoodle                       | 1015            |            |
| Labradoodle Goldendoodle Cross    | 3               |            |

|                                    |       |      |
|------------------------------------|-------|------|
| Labradoodle, Australian            | 1822  |      |
| Labrador Retriever                 | 25382 | 1    |
| Lagotto Romagnolo                  | 1     |      |
| Lancashire Heeler                  |       | 270  |
| Lapponian Herder                   | 370   |      |
| Maltipoo                           | 2     |      |
| Markiesje                          | 1     |      |
| Miniature American Shepherd        | 115   | 37   |
| Miniature Poodle                   | 6519  | 1    |
| Mixed Breed                        | 2     | 1    |
| Moyen/Klein Poodle                 | 178   |      |
| Norwegian Elkhound                 | 220   |      |
| Nova Scotia Duck Tolling Retriever | 4143  | 2436 |
| Pomeranian                         | 1     |      |
| Portuguese Water Dog               | 4720  |      |
| Rat Terrier                        | 1     |      |
| Schipperke                         | 10    |      |
| Shetland Sheepdog                  | 1     | 2954 |
| Silken Windhound                   |       | 118  |
| Silky Terrier                      | 29    |      |
| Spanish Water Dog                  | 767   |      |
| Sprocker Spaniel                   | 3     |      |
| Standard Poodle                    | 348   |      |
| Swedish Lapphund                   | 1206  |      |
| Tibetan Terrier                    | 1     |      |
| Toy Poodle                         | 6743  |      |
| Whippet, Longhaired                |       | 53   |
| Yorkshire Terrier                  | 317   |      |

---

Table S5. Breeds and breed mixes emphasized in paper that met inclusion criteria of at least 50 dogs tested per year for at least eight years

| <b>CEA</b>                         | <b>prcd-PRA</b>                    |
|------------------------------------|------------------------------------|
| Australian Shepherd                | American Eskimo Dog                |
| Border Collie                      | Australian Cattle Dog              |
| Collie                             | Australian Shepherd                |
| Nova Scotia Duck Tolling Retriever | Chesapeake Bay Retriever           |
| Shetland Sheepdog                  | Chinese Crested                    |
|                                    | Dwarf Poodle                       |
|                                    | English Cocker Spaniel             |
|                                    | Entlebucher Mountain Dog           |
|                                    | Finnish Lapphund                   |
|                                    | Golden Retriever                   |
|                                    | Labradoodle, Australian            |
|                                    | Labrador Retriever                 |
|                                    | Miniature Poodle                   |
|                                    | Nova Scotia Duck Tolling Retriever |
|                                    | Portuguese Water Dog               |
|                                    | Spanish Water Dog                  |
|                                    | Swedish Lapphund                   |
|                                    | Toy Poodle                         |

Table S6. Breeds and breed mixes in dataset with disease-associated allele

| <b>pred-PRA</b>                    | <b>CEA</b>                         |
|------------------------------------|------------------------------------|
| American Cocker Spaniel            | Australian Shepherd                |
| American Eskimo Dog                | Australian Shepherd, Miniature     |
| Australian Cattle Dog              | Bearded Collie                     |
| Australian Labradoodle             | Berger d'Auvergne                  |
| Australian Shepherd                | Border Collie                      |
| Australian Shepherd, Miniature     | Boykin Spaniel                     |
| Australian Shepherd, Toy           | Collie                             |
| Australian Stumpy Tail Cattle Dog  | English Shepherd                   |
| Barbet                             | Hokkaido Dog                       |
| Bolognese                          | Lancashire Heeler                  |
| Bolonka Zwetna                     | Longhaired Whippet                 |
| Chesapeake Bay Retriever           | Miniature American Shepherd        |
| Chinese Crested                    | Nova Scotia Duck Tolling Retriever |
| Cockapoo                           | Shetland Sheepdog                  |
| Coton de Tulear                    | Silken Windhound                   |
| Dwarf Poodle                       |                                    |
| English Cocker Spaniel             |                                    |
| Entlebucher Mountain Dog           |                                    |
| Finnish Lapphund                   |                                    |
| Giant Schnauzer                    |                                    |
| Golden Retriever                   |                                    |
| Goldendoodle                       |                                    |
| Karelian Bear Dog                  |                                    |
| Kuvasz                             |                                    |
| Labradoodle                        |                                    |
| Labrador Retriever                 |                                    |
| Labrador/Golden Retriever Cross    |                                    |
| Lapponian Herder                   |                                    |
| Miniature American Shepherd        |                                    |
| Miniature Poodle                   |                                    |
| Moyen/Klein Poodle                 |                                    |
| Norwegian Elkhound                 |                                    |
| Nova Scotia Duck Tolling Retriever |                                    |
| Portuguese Water Dog               |                                    |
| Schipperke                         |                                    |
| Silky Terrier                      |                                    |
| Spanish Water Dog                  |                                    |
| Standard Poodle                    |                                    |
| Swedish Lapphund                   |                                    |
| Toy Poodle                         |                                    |
| Yorkshire Terrier                  |                                    |



Table S7. Relative rank of dog breeds and breed mixes comparing pred-PRA affected to unaffected status (LRM) and affected or carrier to clear status (MRM) according to model-generated measure of likelihood (log-odds ratio) from greatest likelihood to least in models with global dataset including breed, country, and year variables

| Rank | LRM for affected Genotype         | LRM p-value | MRM for affected Genotype          | MRM affected SE | MRM for carrier Genotype           | MRM carrier SE |
|------|-----------------------------------|-------------|------------------------------------|-----------------|------------------------------------|----------------|
| 1    | Karelian Bear Dog                 | 0.045548    | Karelian Bear Dog                  | 5.52e-06        | Karelian Bear Dog                  | 1.33e-05       |
| 2    | Barbet                            | 0.064252    | Swedish Lapphund                   | 0.000703063     | Swedish Lapphund                   | 0.004299618    |
| 3    | Swedish Lapphund                  | 4.65e-05    | Barbet                             | 1.69e-06        | American Eskimo Dog*               | 3.057e-05      |
| 4    | Australian Stumpy Tail Cattle Dog | 0.933498    | Entlebucher Mountain Dog           | 0.00029565      | Entlebucher Mountain Dog           | 1.865e-03      |
| 5    | American Eskimo Dog*              | 0.921564    | American Eskimo Dog*               | 1.60e-06        | Bolognese                          | 4.463e-05      |
| 6    | Entlebucher Mountain Dog          | 0.97598     | Australian Cattle Dog              | 0.001073267     | Nova Scotia Duck Tolling Retriever | 1.626e-02      |
| 7    | Australian Cattle Dog             | 0.955735    | Kuvasz                             | 4.62e-05        | Australian Cattle Dog              | 6.342e-03      |
| 8    | Bolognese                         | 0.978623    | Australian Stumpy Tail Cattle Dog  | 7.12e-06        | Kuvasz                             | 5.781e-04      |
| 9    | Cockapoo                          | 0.584088    | English Cocker Spaniel             | 0.002298848     | Australian Shepherd, Toy           | 4.641e-05      |
| 10   | Kuvasz                            | 0.214248    | Bolognese                          | 1.50e-06        | English Cocker Spaniel             | 2.005e-02      |
| 11   | English Cocker Spaniel            | 0.006659    | Australian Shepherd, Miniature     | 2.01e-05        | Australian Stumpy Tail Cattle Dog  | 3.059e-05      |
| 12   | Yorkshire Terrier                 | 0.445787    | Australian Shepherd, Toy           | 3.39e-06        | Australian Shepherd, Miniature     | 2.254e-04      |
| 13   | Australian Shepherd, Miniature    | 0.152148    | Lapponian Herder                   | 1.55e-05        | Labradoodle, Australian            | 1.363e-03      |
| 14   | Cocker Spaniel (American)         | 0.011636    | Nova Scotia Duck Tolling Retriever | 0.000628771     | Dwarf Poodle                       | 8.613e-04      |
| 15   | Australian Shepherd, Toy          | 0.264379    | Cockapoo                           | 1.583e-05       | Finnish Lapphund                   | 1.702e-03      |
| 16   | Giant Schnauzer                   | 0.225084    | Cocker Spaniel (American)          | 1.996e-05       | Chesapeake Bay Retriever           | 6.065e-04      |
| 17   | Spanish Water Dog                 | 0.000362    | Spanish Water Dog                  | 2.990e-05       | Spanish Water Dog                  | 6.533e-04      |
| 18   | Lapponian Herder                  | 0.00393     | Finnish Lapphund                   | 7.442e-05       | Norwegian Elkhound                 | 4.329e-04      |

|    |                                    |          |                                 |           |                                 |           |
|----|------------------------------------|----------|---------------------------------|-----------|---------------------------------|-----------|
| 19 | Finnish Lapphund                   | 4.75e-10 | Yorkshire Terrier               | 5.872e-06 | Coton de Tulear                 | 2.010e-06 |
| 20 | Nova Scotia Duck Tolling Retriever | <2e-16   | Toy Poodle                      | 1.058e-03 | Giant Schnauzer                 | 4.828e-05 |
| 21 | Toy Poodle                         | <2e-16   | Chesapeake Bay Retriever        | 2.371e-05 | Cockapoo                        | 3.123e-04 |
| 22 | Labradoodle                        | 5.92e-09 | Labrador Retriever              | 6.113e-04 | Bolonka Zwetna                  | 2.643e-05 |
| 23 | Chesapeake Bay Retriever           | 4.31e-08 | Miniature Poodle                | 7.277e-04 | Miniature American Shepherd     | 4.019e-05 |
| 24 | Labrador Retriever                 | <2e-16   | Labradoodle                     | 2.630e-05 | Portuguese Water Dog            | 8.761e-03 |
| 25 | Miniature Poodle                   | <2e-16   | Giant Schnauzer                 | 2.065e-06 | Toy Poodle                      | 2.562e-02 |
| 26 | Miniature American Shepherd        | 0.103473 | Dwarf Poodle                    | 1.075e-05 | Miniature Poodle                | 2.593e-02 |
| 27 | Labrador/Golden Retriever Cross    | 0.01958  | Portuguese Water Dog            | 1.544e-04 | Moyen Poodle (Klein Poodle)     | 6.815e-05 |
| 28 | Dwarf Poodle                       | 3.16e-06 | Miniature American Shepherd     | 9.309e-07 | Labrador Retriever              | 1.638e-02 |
| 29 | Portuguese Water Dog               | <2e-16   | Labrador/Golden Retriever Cross | 2.296e-06 | Yorkshire Terrier               | 1.484e-04 |
| 30 | Standard Poodle                    | 0.005655 | Labradoodle, Australian         | 2.312e-05 | Lapponian Herder                | 2.458e-04 |
| 31 | Chinese Crested                    | <2e-16   | Australian Cobberdog            | 4.091e-09 | Labradoodle                     | 5.565e-04 |
| 32 | Labradoodle, Australian            | 4.71e-13 | Markiesje                       | 4.091e-09 | Cocker Spaniel (American)       | 2.380e-04 |
| 33 | Goldendoodle                       | 0.008673 | Chinese Crested                 | 1.439e-05 | Goldendoodle                    | 9.412e-05 |
| 34 | Golden Retriever                   | <2e-16   | Lagotto Romagnolo               | 2.138e-09 | Schipperke                      | 6.888e-06 |
| 35 | Australian Shepherd                | 1.64e-09 | Border Collie                   | 2.287e-09 | Barbet                          | 5.233e-06 |
| 36 | Pomeranian                         | 0.995835 | Pomeranian                      | 3.475e-09 | Silky Terrier                   | 7.914e-06 |
| 37 | Lagotto Romagnolo                  | 0.995795 | Standard Poodle                 | 1.231e-06 | Labrador/Golden Retriever Cross | 7.258e-05 |
| 38 | Chihuahua                          | 0.987674 | Goldendoodle                    | 1.670e-06 | Golden Retriever                | 1.280e-03 |
| 39 | Rat Terrier                        | 0.995731 | Field Spaniel                   | 3.500e-09 | Chinese Crested                 | 5.514e-04 |
| 40 | Border Collie                      | 0.995711 | Tibetan Terrier                 | 3.500e-09 | Standard Poodle                 | 7.453e-05 |
| 41 | Coton de Tulear                    | 0.990626 | Rat Terrier                     | 3.921e-09 | Australian Shepherd             | 2.257e-04 |
| 42 | Black Russian Terrier              | 0.994851 | American Hairless (Rat) Terrier | 4.299e-09 | Australian Cobberdog            | 8.001e-09 |
| 43 | Maltipoo                           | 0.993786 | Boykin Spaniel                  | 4.490e-09 | Markiesje                       | 8.001e-09 |

|    |                                 |          |                                    |           |                                    |           |
|----|---------------------------------|----------|------------------------------------|-----------|------------------------------------|-----------|
| 44 | Australian Cobberdog            | 0.995663 | Australian Shepherd                | 4.887e-06 | Lagotto Romagnolo                  | 5.103e-09 |
| 45 | Field Spaniel                   | 0.995662 | Shetland Sheepdog                  | 4.171e-09 | Border Collie                      | 5.397e-09 |
| 46 | Markiesje                       | 0.995663 | Golden Retriever                   | 7.927e-06 | Pomeranian                         | 1.358e-08 |
| 47 | Tibetan Terrier                 | 0.995662 | Black Russian Terrier              | 8.998e-10 | Field Spaniel                      | 1.399e-08 |
| 48 | Sprocker Spaniel                | 0.992437 | Maltipoo                           | 1.185e-09 | Tibetan Terrier                    | 1.399e-08 |
| 49 | Bolonka Zwetna                  | 0.972517 | Mixed Breed                        | 1.552e-09 | Rat Terrier                        | 2.558e-09 |
| 50 | American Hairless (Rat) Terrier | 0.995606 | Sprocker Spaniel                   | 5.591e-10 | Shetland Sheepdog                  | 1.122e-08 |
| 51 | German Spitz                    | 0.989962 | Labradoodle,<br>Goldendoodle Cross | 8.486e-10 | American Hairless<br>(Rat) Terrier | 2.785e-09 |
| 52 | Boykin Spaniel                  | 0.995564 | Coton de Tulear                    | 4.717e-10 | Boykin Spaniel                     | 2.864e-09 |
| 53 | Schipperke                      | 0.988248 | Collie                             | 2.083e-10 | Black Russian Terrier              | 4.225e-09 |
| 54 | Moyen Poodle (Klein Poodle)     | 0.946985 | German Spitz                       | 1.867e-10 | Maltipoo                           | 3.614e-09 |
| 55 | English Shepherd                | 0.988952 | Chihuahua                          | 1.417e-10 | German Spitz                       | 1.762e-08 |
| 56 | Labradoodle Goldendoodle Cross  | 0.991843 | Schipperke                         | 1.446e-10 | Mixed Breed                        | 3.733e-09 |
| 57 | Mixed Breed                     | 0.99304  | English Shepherd                   | 1.000e-10 | Sprocker Spaniel                   | 7.500e-09 |
| 58 | Silky Terrier                   | 0.981046 | Silky Terrier                      | 3.128e-10 | English Shepherd                   | 1.694e-08 |
| 59 | Collie                          | 0.991013 | Bolonka Zwetna                     | 2.271e-10 | Collie                             | 5.928e-09 |
| 60 | Shetland Sheepdog               | 0.995151 | Moyen Poodle (Klein<br>Poodle)     | 7.703e-10 | Labradoodle<br>Goldendoodle Cross  | 2.046e-09 |
| 61 | Norwegian Elkhound              | 0.95024  | Norwegian Elkhound                 | 3.614e-09 | Chihuahua                          | 5.602e-08 |

---

LRM = logistic regression model, MRM = multinomial regression model, SE = standard error

\*Intercept in regression models

Table S8. Breeds in prcd-PRA dataset ranked by number of new dogs registered to AKC in 2004<sup>1</sup>

| <b>2004 Rank</b> | <b>Breed</b>                          | <b># New Registrations</b> |
|------------------|---------------------------------------|----------------------------|
| 1                | Labrador Retriever                    | 146,692                    |
| 2                | Golden Retriever                      | 52,550                     |
| 5                | Yorkshire Terrier                     | 43,522                     |
| 8                | Poodle                                | 32,671                     |
| 10               | Chihuahua                             | 24,850                     |
| 13               | Pomeranian                            | 21,269                     |
| 15               | American Cocker Spaniel               | 18,553                     |
| 18               | Shetland Sheepdog                     | 15,605                     |
| 34               | Australian Shepherd                   | 6,116                      |
| 36               | Collie                                | 5,485                      |
| 46               | Chesapeake Bay Retriever              | 3,454                      |
| 57               | Chinese Crested                       | 2,314                      |
| 60               | Border Collie                         | 1,983                      |
| 69               | Portuguese Water Dog                  | 1,535                      |
| 71               | Silky Terrier                         | 1,503                      |
| 74               | Australian Cattle Dog                 | 1,478                      |
| 75               | English Cocker Spaniel                | 1,326                      |
| 79               | Schipperke                            | 1,092                      |
| 81               | Giant Schnauzer                       | 1,012                      |
| 92               | Norwegian Elkhound                    | 738                        |
| 96               | Tibetan Terrier                       | 685                        |
| 98               | Black Russian Terrier                 | 656                        |
| 110              | American Eskimo Dog                   | 470                        |
| 118              | Nova Scotia Duck Tolling<br>Retriever | 318                        |
| 128              | Kuvasz                                | 177                        |
| 138              | Field Spaniel                         | 125                        |

<sup>1</sup>Adapted from AKC registration statistics 1991-2008 ([akc.org/about/archive/digital-collections/](http://akc.org/about/archive/digital-collections/))

Table S9. Relative rank of AKC groups comparing prcd-PRA affected to unaffected status (LRM) and affected or carrier to clear status (MRM) according to model-generated measure of likelihood (log-odds ratio) from greatest likelihood to least in models with global dataset including AKC group and year variables.

| <b>Rank</b> | <b>LRM for affected Genotype</b> | <b>LRM p-value</b> | <b>MRM for affected Genotype</b> | <b>MRM affected SE</b> | <b>MRM for carrier Genotype</b> | <b>MRM carrier SE</b> |
|-------------|----------------------------------|--------------------|----------------------------------|------------------------|---------------------------------|-----------------------|
| 1           | Foundation Stock Service*        | <2e-16             | Foundation Stock Service*        | 9.177e-07              | Foundation Stock Service*       | 2.214e-05             |
| 2           | Herding                          | 1.82e-05           | Herding                          | 1.578e-03              | Hound                           | 1.453e-04             |
| 3           | Non-sporting                     | <2e-16             | Non-sporting                     | 1.143e-03              | Herding                         | 1.995e-02             |
| 4           | Sporting                         | <2e-16             | Sporting                         | 1.022e-03              | Non-sporting                    | 2.114e-02             |
| 5           | Toy                              | <2e-16             | Toy                              | 7.398e-04              | Sporting                        | 1.320e-02             |
| 6           | Working                          | <2e-16             | Working                          | 5.736e-04              | Working                         | 2.583e-02             |
| 7           | Terrier                          | 0.986              | Terrier                          | 5.665e-11              | Toy                             | 2.195e-02             |
| 8           | Hound                            | 0.909              | Hound                            | NaN                    | Terrier                         | 1.373e-10             |

LRM = logistic regression model, MRM = multinomial regression model, SE = standard error

\*Intercept in regression model

Table S10. Relative rank of FCI groups comparing prcd-PRA affected to unaffected status (LRM) and affected or carrier status (MRM) according to model-generated measure of likelihood (log-odds ratio) from greatest likelihood to least according to models with global dataset including FCI group and year variables.

| Rank | LRM for affected Genotype                                             | LRM p-value | MRM for affected Genotype                                             | MRM affected SE | MRM for carrier Genotype                                              | MRM carrier SE |
|------|-----------------------------------------------------------------------|-------------|-----------------------------------------------------------------------|-----------------|-----------------------------------------------------------------------|----------------|
| 1    | Pinscher and Schnauzer – Molossoid and Swiss Mountain and Cattle dogs | <2e-16      | Pinscher and Schnauzer – Molossoid and Swiss Mountain and Cattle dogs | 1.068e-06       | Pinscher and Schnauzer – Molossoid and Swiss Mountain and Cattle dogs | 1.923e-03      |
| 2    | Sheepdogs and Cattle dogs (except Swiss Cattle dogs)                  | <2e-16      | Sheepdogs and Cattle dogs (except Swiss Cattle dogs)                  | 2.324e-03       | Spitz and Primitive Types                                             | 1.657e-02      |
| 3    | Terriers                                                              | 0.00302     | Spitz and Primitive Types                                             | 1.180e-03       | Sheepdogs and Cattle dogs (except Swiss Cattle dogs)                  | 2.498e-02      |
| 4    | Spitz and Primitive Types                                             | 3.75e-16    | Terriers                                                              | 6.800e-06       | Retrievers – Flushing Dogs – Water Dogs                               | 1.566e-02      |
| 5    | Retrievers – Flushing Dogs – Water Dogs                               | 2.69e-11    | Retrievers – Flushing Dogs – Water Dogs                               | 9.644e-04       | Companion and Toy Dogs*                                               | 1.874e-05      |
| 6    | Companion and Toy Dogs*                                               | <2e-16      | Companion and Toy Dogs*                                               | 1.068e-06       | Terriers                                                              | 2.227e-04      |

LRM = logistic regression model, MRM = multinomial regression model, SE = standard error

\*Intercept in regression equation

Table S11. Relative rank of clades comparing prcd-PRA affected to unaffected status (LRM) and affected or carrier to clear status (MRM) according to model-generated measure of likelihood (log-odds ratio) from greatest likelihood to least according to models with global dataset including clade and year variables

| Rank | LRM for affected Genotype | LRM p-value | MRM for affected Genotype | MRM affected SE | MRM for carrier Genotype  | MRM carrier SE |
|------|---------------------------|-------------|---------------------------|-----------------|---------------------------|----------------|
| 1    | Toy Spitz                 | 0.33        | Toy Spitz                 | 3.300e-04       | Toy Spitz                 | 1.752e-03      |
| 2    | Alpine*                   | <2e-16      | Alpine*                   | 2.656e-07       | Alpine*                   | 1.016e-05      |
| 3    | Spaniel                   | 0.36        | Spaniel                   | 1.874e-03       | Mediterranean             | 4.136e-04      |
| 4    | UK Rural                  | 0.17        | Mediterranean             | 3.423e-05       | Spaniel                   | 1.713e-02      |
| 5    | Mediterranean             | 0.23        | UK Rural                  | 1.594e-03       | UK Rural                  | 1.964e-02      |
| 6    | Terrier                   | 0.377       | Terrier                   | 4.679e-06       | Unclustered1 <sup>1</sup> | 1.723e-03      |
| 7    | Drover                    | 0.342       | Drover                    | 1.427e-06       | Drover                    | 5.919e-05      |
| 8    | Unclustered1 <sup>1</sup> | 9.63e-11    | Unclustered1 <sup>1</sup> | 4.949e-05       | Poodle                    | 1.599e-02      |
| 9    | Poodle                    | <2e-16      | Poodle                    | 5.996e-04       | Nordic Spitz              | 3.640e-04      |
| 10   | Retriever                 | <2e-16      | Retriever                 | 6.083e-04       | Retriever                 | 1.381e-02      |
| 11   | Nordic Spitz              | 1.65e-05    | Nordic Spitz              | 6.657e-06       | Terrier                   | 1.491e-04      |
| 12   | American Toy              | 1.04e-14    | American Toy              | 8.912e-06       | American Toy              | 6.976e-04      |
| 13   | Pointer Setter            | 0.969       | Pointer Setter            | 9.581e-11       | Pointer Setter            | 4.004e-10      |
| 14   | Unclustered2 <sup>2</sup> | 0.968       | Unclustered2 <sup>2</sup> | 1.051e-10       | Unclustered2 <sup>2</sup> | 4.056e-10      |
| 15   | American Terrier          | 0.955       | American Terrier          | 7.476e-11       | American Terrier          | 7.147e-11      |

LRM = logistic regression model, MRM = multinomial regression model, SE = standard error

\*Intercept in regression equation

<sup>1</sup>Finnish Lapphund, did not cluster with other clades

<sup>2</sup>Tibetan Terrier, did not cluster with other clades

Table S12. Relative rank of all breeds and breed mixes comparing CEA affected to unaffected status (LRM) and affected or carrier to clear status (MRM) according to model-generated measure of likelihood (log-odds ratio) from greatest likelihood to least according to models with global dataset including breed, country, and year variables.

| Rank | LRM for affected<br>Genotype          | LRM p-value | MRM for affected<br>Genotype          | MRM affected<br>SE | MRM for carrier<br>Genotype           | MRM carrier SE |
|------|---------------------------------------|-------------|---------------------------------------|--------------------|---------------------------------------|----------------|
| 1    | Hokkaido Dog                          | 7.40e-09    | Hokkaido Dog                          | 5.665e-05          | Hokkaido Dog                          | 5.911e-05      |
| 2    | Collie                                | <2e-16      | Collie                                | 1.633e-02          | Collie                                | 2.571e-02      |
| 3    | Boykin Spaniel                        | 4.04e-14    | Boykin Spaniel                        | 2.218e-04          | Whippet, Longhaired                   | 2.872e-04      |
| 4    | Silken Windhound                      | 1.68e-10    | Whippet, Longhaired                   | 9.438e-05          | Shetland Sheepdog                     | 2.396e-02      |
| 5    | Whippet, Longhaired                   | 9.34e-06    | Silken Windhound                      | 1.396e-04          | Berger d'Auvergne                     | 7.091e-05      |
| 6    | Shetland Sheepdog                     | <2e-16      | Shetland Sheepdog                     | 8.510e-03          | Boykin Spaniel                        | 1.258e-03      |
| 7    | Border Collie                         | 0.00067     | Border Collie                         | 8.850e-03          | Silken Windhound                      | 7.171e-04      |
| 8    | Bearded Collie                        | 0.778       | Bearded Collie                        | 4.244e-05          | Border Collie                         | 2.293e-02      |
| 9    | Australian Shepherd*                  | 0.96233     | Australian Shepherd*                  | 5.506e-06          | English Shepherd                      | 2.159e-05      |
| 10   | Lancashire Heeler                     | 0.81349     | Lancashire Heeler                     | 2.357e-05          | Lancashire Heeler                     | 1.452e-03      |
| 11   | Nova Scotia Duck<br>Tolling Retriever | 0.38093     | Nova Scotia Duck<br>Tolling Retriever | 3.634e-04          | Nova Scotia Duck<br>Tolling Retriever | 3.209e-02      |
| 12   | Miniature Poodle                      | 0.99633     | Miniature Poodle                      | 2.151e-08          | Australian Shepherd*                  | 3.693e-05      |
| 13   | Mixed Breed                           | 0.99633     | Mixed Breed                           | 2.151e-08          | Bearded Collie                        | 8.588e-04      |
| 14   | English Shepherd                      | 0.99267     | Labrador Retriever                    | 1.883e-08          | Miniature American<br>Shepherd        | 1.060e-05      |
| 15   | Australian Shepherd,<br>Toy           | 0.98586     | English Shepherd                      | 1.583e-08          | Australian Shepherd,<br>Miniature     | 4.883e-05      |
| 16   | Labrador Retriever                    | 0.99601     | Australian Shepherd,<br>Toy           | 1.437e-08          | Miniature Poodle                      | 1.814e-08      |
| 17   | Miniature American<br>Shepherd        | 0.98058     | Berger d'Auvergne                     | 1.071e-08          | Mixed Breed                           | 1.814e-08      |
| 18   | Australian Shepherd,<br>Miniature     | 0.95199     | Miniature American<br>Shepherd        | 1.402e-08          | Labrador Retriever                    | 2.802e-08      |
| 19   | Berger d'Auvergne                     | 0.99057     | Australian Shepherd,<br>Miniature     | NaN                | Australian Shepherd,<br>Toy           | 1.870e-08      |

LRM = logistic regression model, MRM = multinomial regression model, SE = standard error

\*Intercept in regression models



Table S13. Breeds in CEA dataset ranked by number of new dogs registered to AKC in 2005<sup>1</sup>

| <b>2005 Rank</b> | <b>Breed</b>                          | <b># New Registrations</b> |
|------------------|---------------------------------------|----------------------------|
| 1                | Labrador Retriever                    | 137,867                    |
| 8                | Poodle                                | 31,638                     |
| 18               | Shetland Sheepdog                     | 14,278                     |
| 34               | Australian Shepherd                   | 6,221                      |
| 36               | Collie                                | 5,098                      |
| 55               | Border Collie                         | 2,378                      |
| 101              | Bearded Collie                        | 485                        |
| 113              | Nova Scotia Duck Tolling<br>Retriever | 347                        |

<sup>1</sup>Adapted from AKC registration statistics 1991-2008 ([akc.org/about/archive/digital-collections/](http://akc.org/about/archive/digital-collections/))

Table S14. Breeds in prcd-PRA and CEA dataset ranked by number of new dogs registered to AKC in 2019<sup>1</sup>

| 2019 Rank | Breed                              |
|-----------|------------------------------------|
| 1         | Labrador Retriever                 |
| 3         | Golden Retriever                   |
| 6         | Poodle                             |
| 12        | Yorkshire Terrier                  |
| 13        | Australian Shepherd                |
| 24        | Pomeranian                         |
| 25        | Shetland Sheepdog                  |
| 28        | American Cocker Spaniel            |
| 29        | Miniature American Shepherd        |
| 33        | Border Collie                      |
| 35        | Chihuahua                          |
| 38        | Collie                             |
| 46        | Chesapeake Bay Retriever           |
| 49        | Portuguese Water Dog               |
| 50        | English Cocker Spaniel             |
| 55        | Australian Cattle Dog              |
| 72        | Giant Schnauzer                    |
| 81        | Chinese Crested                    |
| 82        | Coton de Tulear                    |
| 87        | Nova Scotia Duck Tolling Retriever |
| 90        | Boykin Spaniel                     |
| 91        | Lagotto Romagnolo                  |
| 92        | Rat Terrier                        |
| 94        | Norwegian Elkhound                 |
| 95        | Barbet                             |
| 103       | Tibetan Terrier                    |
| 108       | Schipperke                         |
| 111       | Silky Terrier                      |
| 116       | Black Russian Terrier              |
| 122       | American Eskimo Dog                |
| 126       | American Hairless (Rat) Terrier    |
| 138       | Bearded Collie                     |
| 146       | Spanish Water Dog                  |
| 155       | Field Spaniel                      |
| 167       | Finnish Lapphund                   |
| 168       | Kuvasz                             |
| 169       | Entlebucher Mountain Dog           |

<sup>1</sup>adapted from AKC 2019 Most Popular Dog Breeds (based on most recent publicly available rankings; registration counts not available) (<https://www.akc.org/most-popular-breeds/2019-full-list/>)

Table S15. Relative rank of AKC groups comparing CEA affected to unaffected status (LRM) and affected or carrier to clear status (MRM) according to model-generated measure of likelihood (log-odds ratio) from greatest likelihood to least according to models with global dataset including AKC group and year variables

| Rank | LRM for -/-               | LRM p-value | MRM for -/-               | MRM -/- SE | MRM for +/-               | MRM +/- SE |
|------|---------------------------|-------------|---------------------------|------------|---------------------------|------------|
| 1    | Foundation Stock Service* | 0.235       | Foundation Stock Service* | 1.644e-07  | Foundation Stock Service* | 6.138e-06  |
| 2    | Herding                   | 3.29e-05    | Herding                   | 3.374e-04  | Herding                   | 2.522e-02  |
| 3    | Sporting                  | 1.06e-10    | Sporting                  | 2.789e-04  | Miscellaneous             | 1.408e-03  |
| 4    | Miscellaneous             | 9.62e-06    | Miscellaneous Class       | 8.342e-06  | Sporting                  | 2.376e-02  |
| 5    | Non-sporting              | 0.931       | Non-sporting              | 3.023e-11  | Non-sporting              | 2.726e-10  |

LRM = logistic regression model, MRM = multinomial regression model, SE = standard error

\*Intercept in regression models

Table S16. Relative rank of FCI groups comparing CEA affected to unaffected status (LRM) and affected or carrier to clear status (MRM) according to model generated measure of likelihood (log-odds ratio) from greatest likelihood to least according to models with global dataset including FCI group and year variables

| <b>Rank</b> | <b>LRM for affected Genotype</b>                        | <b>LRM p-value</b> | <b>MRM for affected Genotype</b>                        | <b>MRM affected SE</b> | <b>MRM for carrier Genotype</b>                         | <b>MRM carrier SE</b> |
|-------------|---------------------------------------------------------|--------------------|---------------------------------------------------------|------------------------|---------------------------------------------------------|-----------------------|
| 1           | Spitz and Primitive Types                               | 0.931              | Spitz and Primitive Types                               | 6.417e-05              | Spitz and Primitive Types                               | 6.418e-05             |
| 2           | Sheepdogs and Cattle dogs<br>(except Swiss Cattle dogs) | 0.95               | Companion and Toy Dogs*                                 | 2.278e-07              | Sheepdogs and Cattle dogs<br>(except Swiss Cattle dogs) | 2.624e-02             |
| 3           | Retrievers – Flushing Dogs –<br>Water Dogs              | 0.965              | Sheepdogs and Cattle dogs<br>(except Swiss Cattle dogs) | 2.325e-04              | Retrievers – Flushing Dogs –<br>Water Dogs              | 2.618e-02             |
| 4           | Companion and Toy Dogs*                                 | 0.83               | Retrievers – Flushing Dogs –<br>Water Dogs              | 1.680e-04              | Companion and Toy Dogs*                                 | 8.792e-06             |

LRM = logistic regression model, MRM = multinomial regression model, SE = standard error

\*Intercept in regression models

Table S17. Relative rank of clades comparing CEA affected to unaffected status (LRM) and affected or carrier to clear status (MRM) according to model-generated measure of likelihood (log-odds ratio) from greatest likelihood to least according to models with global dataset including clade and year variables

| <b>Rank</b> | <b>LRM for affected Genotype</b> | <b>LRM p-value</b> | <b>MRM for affected Genotype</b> | <b>MRM affected SE</b> | <b>MRM for carrier genotype</b> | <b>MRM carrier SE</b> |
|-------------|----------------------------------|--------------------|----------------------------------|------------------------|---------------------------------|-----------------------|
| 1           | Spaniel                          | 0.948              | Spaniel                          | 1.518e-04              | Spaniel                         | 1.350e-03             |
| 2           | UK Rural                         | 0.95               | Poodle                           | 3.489e-07              | UK Rural                        | 2.658e-02             |
| 3           | Retriever                        | 0.965              | UK Rural                         | 3.130e-04              | Retriever                       | 2.523e-02             |
| 4           | Poodle*                          | 0.849              | Retriever                        | 1.608e-04              | Poodle                          | 6.644e-06             |

LRM = logistic regression model, MRM = multinomial regression model, SE = standard error

\*Intercept in regression models

Table S18. CHIC\* enforcement of genetic testing for prcd-PRA and CEA in breeds included in dataset

| Breed                                           | prcd-PRA |          | CEA      |          |
|-------------------------------------------------|----------|----------|----------|----------|
|                                                 | Optional | Required | Optional | Required |
| American Eskimo Dog                             |          | √        |          |          |
| American Hairless (Rat) Terrier                 | √        |          |          |          |
| Australian Cattle Dog                           |          | √        |          |          |
| Australian Shepherd                             |          |          | √        |          |
| Australian Shepherd, Miniature <sup>1</sup>     |          |          | √        |          |
| Barbet                                          |          | √        |          |          |
| Bearded Collie <sup>2</sup>                     |          |          |          |          |
| Black Russian Terrier <sup>2</sup>              |          |          |          |          |
| Border Collie                                   |          |          | √        |          |
| Boykin Spaniel                                  |          |          |          | √        |
| Chesapeake Bay Retriever <sup>3</sup>           |          | √        |          |          |
| Chihuahua <sup>2</sup>                          |          |          |          |          |
| Chinese Crested                                 |          | √        |          |          |
| Cocker Spaniel (American) <sup>2</sup>          |          |          |          |          |
| Collie <sup>2</sup>                             |          |          |          |          |
| Coton de Tulear <sup>2</sup>                    |          |          |          |          |
| English Cocker Spaniel                          |          | √        |          |          |
| Entlebucher (Mountain Dog)                      |          | √        |          |          |
| Field Spaniel <sup>2</sup>                      |          |          |          |          |
| Finnish Lapphund <sup>3</sup>                   |          | √        |          |          |
| Giant Schnauzer                                 | √        |          |          |          |
| Golden Retriever <sup>2</sup>                   |          |          |          |          |
| Hokkaido dog (Ken) <sup>3</sup>                 | √        |          |          | √        |
| Kuvasz <sup>3</sup>                             | √        |          |          |          |
| Labradoodle, Australian                         |          | √        |          |          |
| Labrador Retriever                              | √        |          |          |          |
| Lagotto Romagnolo <sup>2</sup>                  |          |          |          |          |
| Lancashire Heeler                               |          |          |          | √        |
| Miniature American Shepherd <sup>1</sup>        |          |          | √        |          |
| Miniature Poodle <sup>4</sup>                   |          | √        |          |          |
| Norwegian Elkhound <sup>3</sup>                 | √        |          |          |          |
| Nova Scotia Duck Tolling Retriever <sup>3</sup> |          | √        |          |          |
| Pomeranian <sup>2</sup>                         |          |          |          |          |
| Portuguese Water Dog <sup>3</sup>               |          | √        |          |          |
| Rat Terrier <sup>2</sup>                        |          |          |          |          |
| Schipperke <sup>2</sup>                         |          |          |          |          |
| Shetland Sheepdog <sup>3</sup>                  | √        |          | √        |          |
| Silken Windhound                                |          |          |          | √        |
| Silky Terrier <sup>2</sup>                      |          |          |          |          |
| Spanish Water Dog                               |          | √        |          |          |
| Standard Poodle <sup>2,4</sup>                  |          |          |          |          |
| Tibetan Terrier <sup>2</sup>                    |          |          |          |          |
| Toy Poodle <sup>4</sup>                         |          | √        |          |          |
| Yorkshire Terrier <sup>2</sup>                  |          |          |          |          |

\* <https://ofa.org/chic-programs/> (accessed 2/20/2023)

<sup>1</sup>Miniature American Shepherd and Miniature Australian Shepherd listed as same breed according to OFA CHIC database

<sup>2</sup>Breed included in CHIC, but no guidelines on CEA or pred-PRA genetic testing

<sup>3</sup>CHIC references Progressive Retinal Atrophy DNA test, with no specification of what type

<sup>4</sup>Miniature, Standard, and Toy Poodles all listed under “Poodle” in OFA CHIC database

Table S19. Relative rank of countries comparing prcd-PRA affected to unaffected status (LRM) and affected or carrier to clear status (MRM) according to model-generated measure of likelihood (log-odds ratio) from greatest likelihood to least according to models with global dataset including breed, country, and year variables.

| Rank | LRM for affected<br>Genotype | LRM<br>p-value | MRM for affected<br>Genotype | MRM affected<br>SE | MRM for carrier<br>Genotype | MRM<br>carrier SE |
|------|------------------------------|----------------|------------------------------|--------------------|-----------------------------|-------------------|
| 1    | Netherlands Antilles         | 0.992486       | Netherlands Antilles         | 8.377e-10          | China                       | 4.476e-09         |
| 2    | Gibraltar                    | 0.994706       | Paraguay                     | 6.078e-06          | Dominican Republic          | 8.621e-09         |
| 3    | New Caledonia                | 0.994798       | Uruguay                      | 1.785e-05          | Colombia                    | 3.814e-09         |
| 4    | Paraguay                     | 0.994882       | Israel                       | 2.650e-05          | French Polynesia            | 5.381e-09         |
| 5    | Bulgaria                     | 0.995022       | Bulgaria                     | 2.442e-06          | Singapore                   | 1.753e-08         |
| 6    | Israel                       | 0.995087       | New Caledonia                | 3.087e-07          | Greenland                   | 1.717e-08         |
| 7    | Slovenia                     | 0.995267       | Japan                        | 9.487e-05          | Guadeloupe                  | 8.702e-08         |
| 8    | Uruguay                      | 0.995391       | Slovenia                     | 5.244e-06          | Paraguay                    | 6.103e-06         |
| 9    | Brazil                       | 0.995447       | Gibraltar                    | 3.148e-07          | South Korea                 | 6.503e-06         |
| 10   | Ukraine                      | 0.995449       | Brazil                       | 1.166e-04          | Uruguay                     | 2.768e-05         |
| 11   | Spain                        | 0.995468       | South Africa                 | 1.440e-05          | Macedonia                   | 2.631e-06         |
| 12   | Japan                        | 0.995496       | Cyprus                       | 1.223e-05          | Romania                     | 3.966e-05         |
| 13   | Greece                       | 0.995547       | Spain                        | 1.976e-05          | Taiwan                      | 3.089e-06         |
| 14   | Russia                       | 0.995581       | Australia                    | 1.004e-04          | Latvia                      | 3.301e-05         |
| 15   | Cyprus                       | 0.995586       | Ukraine                      | 2.202e-06          | Bulgaria                    | 9.991e-06         |
| 16   | Slovakia                     | 0.995589       | Greece                       | 4.531e-06          | Greece                      | 2.949e-05         |
| 17   | France                       | 0.995595       | Croatia                      | 4.692e-06          | Japan                       | 5.744e-04         |
| 18   | Italy                        | 0.995614       | Portugal                     | 6.335e-06          | Brazil                      | 5.658e-04         |
| 19   | Croatia                      | 0.995625       | Italy                        | 8.115e-05          | South Africa                | 1.883e-04         |
| 20   | South Africa                 | 0.995632       | New Zealand                  | 5.760e-06          | Portugal                    | 6.271e-05         |
| 21   | Hungary                      | 0.995636       | Slovakia                     | 3.972e-06          | Slovenia                    | 4.862e-05         |
| 22   | Luxembourg                   | 0.995642       | France                       | 5.589e-04          | Ireland                     | 1.992e-04         |
| 23   | Australia                    | 0.995653       | Romania                      | 4.883e-06          | Norway                      | 2.975e-03         |
| 24   | Portugal                     | 0.995667       | Russia                       | 2.730e-05          | Gabon                       | 3.454e-06         |



|    |                        |          |                        |           |                |           |
|----|------------------------|----------|------------------------|-----------|----------------|-----------|
| 25 | United Kingdom         | 0.99569  | Luxembourg             | 1.594e-06 | Cyprus         | 5.476e-05 |
| 26 | Czech Republic         | 0.995696 | Austria                | 4.837e-05 | Russia         | 6.142e-04 |
| 27 | Iceland                | 0.995701 | Czech Republic         | 2.150e-05 | Hungary        | 2.880e-04 |
| 28 | Austria                | 0.995706 | USA                    | 1.242e-03 | Mexico         | 8.296e-06 |
| 29 | Poland                 | 0.995713 | United Kingdom         | 1.091e-03 | Italy          | 9.683e-04 |
| 30 | Romania                | 0.995718 | Finland                | 3.015e-04 | Estonia        | 8.800e-05 |
| 31 | USA                    | 0.995717 | Hungary                | 1.596e-05 | USA            | 1.487e-02 |
| 32 | Ireland                | 0.995745 | Norway                 | 1.456e-04 | France         | 5.599e-03 |
| 33 | Norway                 | 0.995753 | Iceland                | 1.351e-05 | Austria        | 4.979e-04 |
| 34 | New Zealand            | 0.995758 | Estonia                | 3.331e-06 | Iceland        | 2.561e-04 |
| 35 | Belgium                | 0.99578  | Poland                 | 1.335e-05 | Spain          | 2.365e-04 |
| 36 | Estonia                | 0.995784 | Ireland                | 7.274e-06 | Australia      | 1.041e-03 |
| 37 | Finland                | 0.99579  | Netherlands            | 9.368e-05 | Israel         | 8.559e-05 |
| 38 | Netherlands            | 0.995816 | Germany                | 5.101e-04 | Sweden         | 2.426e-02 |
| 39 | Germany                | 0.995821 | Denmark                | 9.022e-05 | United Kingdom | 2.142e-02 |
| 40 | Switzerland            | 0.995833 | Canada                 | 2.790e-04 | New Zealand    | 1.214e-04 |
| 41 | Canada                 | 0.995858 | Switzerland            | 4.000e-05 | Canada         | 7.955e-03 |
| 42 | Denmark                | 0.995874 | Belgium                | 1.761e-05 | Finland        | 5.910e-03 |
| 43 | Sweden                 | 0.995928 | Sweden                 | 1.227e-03 | Germany        | 1.066e-02 |
| 44 | Malta                  | 0.999392 | Andorra*               | 1.597e-06 | Denmark        | 2.731e-03 |
| 45 | Chile                  | 0.999391 | Malta                  | 1.814e-10 | Switzerland    | 6.983e-04 |
| 46 | Dominican Republic     | 0.999567 | Dominican Republic     | 4.896e-12 | Belgium        | 5.769e-04 |
| 47 | Bosnia and Herzegovina | 0.999701 | Colombia               | 5.403e-12 | Luxembourg     | 1.904e-05 |
| 48 | China                  | 0.999762 | China                  | 4.298e-12 | Czech Republic | 3.352e-04 |
| 49 | Macedonia              | 0.99976  | French Polynesia       | 1.040e-11 | Poland         | 2.037e-04 |
| 50 | Qatar                  | 0.999821 | Chile                  | 4.564e-10 | Netherlands    | 2.030e-03 |
| 51 | Guadeloupe             | 0.999798 | Bosnia and Herzegovina | 5.964e-10 | Croatia        | 2.302e-05 |
| 52 | Puerto Rico            | 0.999813 | Panama                 | 7.460e-10 | Argentina      | 1.037e-05 |
| 53 | Latvia                 | 0.999784 | Qatar                  | 5.119e-10 | Reunion        | 1.040e-05 |
| 54 | Panama                 | 0.999849 | Greenland              | 6.715e-11 | Lithuania      | 1.558e-05 |

|    |                     |          |                     |           |                           |           |
|----|---------------------|----------|---------------------|-----------|---------------------------|-----------|
| 55 | Bermuda             | 0.999884 | Singapore           | 6.525e-11 | Ukraine                   | 1.480e-05 |
| 56 | Mexico              | 0.999934 | Macedonia           | 1.516e-09 | Slovakia                  | 2.593e-05 |
| 57 | Reunion             | 0.999935 | Oman                | 7.028e-10 | Serbia-Montenegro         | 7.569e-06 |
| 58 | Oman                | 0.999984 | Bermuda             | 8.082e-10 | Andorra*                  | 3.057e-05 |
| 59 | French Polynesia    | 0.999992 | Puerto Rico         | 5.594e-10 | Malta                     | 6.276e-09 |
| 60 | Colombia            | 0.999998 | Thailand            | 6.451e-10 | Chile                     | 5.076e-09 |
| 61 | Andorra*            | 0.921564 | South Korea         | 2.616e-09 | Netherlands Antilles      | 3.374e-11 |
| 62 | Thailand            | 0.99998  | Taiwan              | 2.759e-09 | Qatar                     | 4.713e-09 |
| 63 | South Korea         | 0.999973 | Guadeloupe          | 3.931e-11 | Bosnia and<br>Herzegovina | 1.574e-08 |
| 64 | Argentina           | 0.999953 | Trinidad and Tobago | 9.844e-10 | Panama                    | 1.916e-08 |
| 65 | Gabon               | 0.999955 | Costa Rica          | 4.336e-10 | Gibraltar                 | 1.125e-08 |
| 66 | Costa Rica          | 0.999956 | Macau               | 7.274e-10 | Trinidad and Tobago       | 6.323e-09 |
| 67 | Liechtenstein       | 0.999942 | Liechtenstein       | 6.958e-10 | Puerto Rico               | 2.659e-09 |
| 68 | Taiwan              | 0.999924 | Gabon               | 9.595e-10 | Thailand                  | 3.009e-09 |
| 69 | Lithuania           | 0.999887 | Mexico              | 7.453e-10 | Bermuda                   | 6.867e-09 |
| 70 | Serbia-Montenegro   | 0.999881 | Latvia              | 1.179e-09 | Macau                     | 3.588e-09 |
| 71 | Trinidad and Tobago | 0.999871 | Argentina           | 3.598e-10 | Oman                      | 7.649e-09 |
| 72 | Singapore           | 0.999724 | Reunion             | 1.320e-10 | Liechtenstein             | 3.395e-09 |
| 73 | Macau               | 0.999717 | Serbia-Montenegro   | 2.643e-10 | New Caledonia             | 1.552e-09 |
| 74 | Greenland           | 0.999695 | Lithuania           | 2.597e-10 | Costa Rica                | 1.709e-09 |

---

LRM = logistic regression model, MRM = multinomial regression model, SE = standard error

\*Intercept in regression equation

Table S20. Relative rank of countries comparing CEA affected to unaffected status (LRM) and affected or carrier to clear status (MRM) according to model-generated measure of likelihood (log-odds ratio) from greatest likelihood to least according to models with global dataset including breed, country, and year variables.

| Rank | LRM affected Genotype | LRM p-value | MRM for affected Genotype | MRM affected SE | MRM for carrier Genotype | MRM carrier SE |
|------|-----------------------|-------------|---------------------------|-----------------|--------------------------|----------------|
| 1    | Kuwait                | 0.99026     | Serbia-Montenegro         | 3.066e-05       | Norfolk Island           | 1.085e-08      |
| 2    | Serbia-Montenegro     | 0.98096     | Greece                    | 1.355e-05       | Belarus                  | 1.188e-08      |
| 3    | Greece                | 0.98123     | Kuwait                    | 4.089e-08       | Bouvet Island            | 2.219e-08      |
| 4    | Slovakia              | 0.98263     | Slovakia                  | 5.701e-05       | Serbia-Montenegro        | 3.060e-05      |
| 5    | Spain                 | 0.98305     | Slovenia                  | 4.443e-05       | Greece                   | 1.354e-05      |
| 6    | Iceland               | 0.98311     | Poland                    | 1.860e-04       | Turkey                   | 3.497e-05      |
| 7    | Slovenia              | 0.98323     | Iceland                   | 6.163e-05       | Lithuania                | 6.906e-06      |
| 8    | Brazil                | 0.9833      | Spain                     | 2.672e-04       | Croatia                  | 1.479e-04      |
| 9    | Latvia                | 0.98333     | Russia                    | 3.911e-05       | Romania                  | 8.769e-06      |
| 10   | Poland                | 0.98334     | Brazil                    | 6.460e-04       | Portugal                 | 1.878e-04      |
| 11   | Russia                | 0.98336     | France                    | 5.491e-03       | New Caledonia            | 9.733e-06      |
| 12   | France                | 0.98356     | Latvia                    | 6.287e-06       | Chile                    | 9.676e-06      |
| 13   | Italy                 | 0.98366     | Italy                     | 8.098e-04       | Slovenia                 | 1.948e-04      |
| 14   | Denmark               | 0.98397     | Croatia                   | 1.774e-05       | Poland                   | 8.594e-04      |
| 15   | Hungary               | 0.98401     | Hungary                   | 8.307e-05       | Russia                   | 1.788e-04      |
| 16   | Australia             | 0.98405     | Denmark                   | 3.946e-04       | Liechtenstein            | 9.577e-06      |
| 17   | Croatia               | 0.9842      | Portugal                  | 1.046e-04       | Iceland                  | 1.842e-04      |
| 18   | Austria               | 0.98423     | Australia                 | 4.565e-04       | Switzerland              | 9.182e-03      |
| 19   | Germany               | 0.98422     | Switzerland               | 4.144e-03       | France                   | 2.127e-02      |
| 20   | Japan                 | 0.98437     | Austria                   | 3.555e-04       | Sweden                   | 6.625e-03      |
| 21   | Luxembourg            | 0.98438     | Germany                   | 6.359e-03       | Peru                     | 3.501e-05      |
| 22   | Switzerland           | 0.98439     | Japan                     | 1.969e-05       | Czech Republic           | 1.690e-03      |
| 23   | New Zealand           | 0.98444     | New Zealand               | 3.116e-05       | Hungary                  | 4.387e-04      |
| 24   | Netherlands           | 0.9846      | Netherlands               | 3.751e-04       | Reunion                  | 1.309e-05      |
| 25   | Belgium               | 0.98467     | Canada                    | 7.759e-04       | Brazil                   | 2.175e-03      |
| 26   | Portugal              | 0.98473     | Belgium                   | 3.318e-04       | Italy                    | 5.058e-03      |

|    |                      |         |                      |           |                      |           |
|----|----------------------|---------|----------------------|-----------|----------------------|-----------|
| 27 | Canada               | 0.98477 | Luxembourg           | 3.473e-05 | Canada               | 7.618e-03 |
| 28 | Sweden               | 0.98492 | Sweden               | 3.154e-04 | USA                  | 2.871e-02 |
| 29 | Norway               | 0.9851  | Norway               | 7.878e-05 | Denmark              | 2.364e-03 |
| 30 | United Kingdom       | 0.98522 | USA                  | 4.803e-03 | Finland              | 5.568e-03 |
| 31 | Ireland              | 0.98531 | Czech Republic       | 7.986e-05 | Austria              | 2.324e-03 |
| 32 | USA                  | 0.98533 | United Kingdom       | 1.909e-03 | Netherlands          | 5.499e-03 |
| 33 | Czech Republic       | 0.9854  | Ireland              | 1.830e-04 | Spain                | 7.128e-04 |
| 34 | Finland              | 0.98564 | Finland              | 3.524e-04 | Germany              | 3.710e-02 |
| 35 | Reunion              | 0.9984  | Argentina*           | 5.506e-06 | Australia            | 2.339e-03 |
| 36 | Norfolk Island       | 0.99958 | Norfolk Island       | 1.622e-12 | Belgium              | 3.362e-03 |
| 37 | Malta                | 0.99959 | Belarus              | 4.389e-12 | United Kingdom       | 3.114e-02 |
| 38 | New Caledonia        | 0.99936 | Malta                | 8.758e-10 | Ireland              | 3.684e-03 |
| 39 | Ukraine              | 0.99963 | Ukraine              | 9.155e-10 | Norway               | 2.282e-03 |
| 40 | Chile                | 0.99939 | Lithuania            | 1.408e-09 | New Zealand          | 1.712e-04 |
| 41 | Lithuania            | 0.99954 | Bulgaria             | 1.771e-09 | Japan                | 1.337e-04 |
| 42 | Liechtenstein        | 0.99948 | Netherlands Antilles | 1.869e-09 | Slovakia             | 1.012e-04 |
| 43 | Belarus              | 0.99978 | Romania              | 1.750e-09 | Colombia             | 1.407e-05 |
| 44 | Bulgaria             | 0.99978 | Uruguay              | 2.027e-09 | Faroe Islands        | 2.191e-04 |
| 45 | Netherlands Antilles | 0.9998  | New Caledonia        | 1.252e-09 | South Africa         | 5.621e-05 |
| 46 | Romania              | 0.99972 | Chile                | 1.362e-09 | Latvia               | 2.128e-05 |
| 47 | Uruguay              | 0.99982 | Liechtenstein        | 1.489e-09 | Luxembourg           | 8.775e-05 |
| 48 | Turkey               | 0.99973 | Bouvet Island        | 2.945e-11 | Argentina*           | 3.693e-05 |
| 49 | Peru                 | 0.99987 | Reunion              | 7.840e-10 | Kuwait               | 6.266e-09 |
| 50 | Colombia             | 0.99998 | Turkey               | 1.775e-09 | Ukraine              | 1.450e-08 |
| 51 | Argentina*           | 0.96233 | Colombia             | 1.893e-09 | Malta                | 1.426e-08 |
| 52 | Estonia              | 0.99994 | Peru                 | 1.716e-09 | Bulgaria             | 1.430e-08 |
| 53 | Faroe Islands        | 0.9998  | Zimbabwe             | 1.206e-09 | Netherlands Antilles | 1.416e-08 |
| 54 | South Africa         | 0.99978 | Singapore            | 1.304e-09 | Uruguay              | 1.394e-08 |
| 55 | Mexico               | 0.99978 | Estonia              | 1.391e-09 | Zimbabwe             | 1.922e-08 |
| 56 | Zimbabwe             | 0.99971 | Mexico               | 1.084e-09 | Singapore            | 1.912e-08 |
| 57 | Singapore            | 0.99968 | South Africa         | 1.254e-09 | Mexico               | 1.278e-08 |
| 58 | Bouvet Island        | 0.99912 | Faroe Islands        | 8.658e-12 | Estonia              | 1.071e-08 |

LRM = logistic regression model, MRM = multinomial regression model, SE = standard error

\*Intercept in regression equation

Table S21. Relative rank of continents comparing prcd-PRA affected to unaffected status (LRM) and affected or carrier to clear status (MRM) according to model-generated measure of likelihood (log-odds ratio) from greatest likelihood to least according to models with global dataset including breed, continent, and year variables

| <b>Rank</b> | <b>LRM for affected Genotype</b> | <b>LRM p-value</b> | <b>MRM for affected Genotype</b> | <b>MRM affected SE</b> | <b>MRM for carrier Genotype</b> | <b>MRM carrier SE</b> |
|-------------|----------------------------------|--------------------|----------------------------------|------------------------|---------------------------------|-----------------------|
| 1           | Asia                             | 0.202977           | South America                    | 9.116e-05              | South America                   | 3.836e-04             |
| 2           | South America                    | 0.179899           | Asia                             | 7.255e-05              | Asia                            | 5.775e-04             |
| 3           | Oceania                          | 0.956968           | Africa*                          | 2.850e-06              | Africa*                         | 2.760e-05             |
| 4           | Africa*                          | < 2e-16            | Oceania                          | 1.773e-04              | North America                   | 8.006e-03             |
| 5           | North America                    | 0.575249           | North America                    | 1.960e-02              | Oceania                         | 8.833e-04             |
| 6           | Europe                           | 0.467673           | Europe                           | 1.978e-02              | Europe                          | 8.066e-03             |

LRM = logistic regression model, MRM = multinomial regression model, SE = standard error

\*Intercept in regression equation

Table S22. Relative rank of continents comparing CEA affected to unaffected status (LRM) and affected or carrier to clear status (MRM) according to model-generated measure of likelihood (log-odds ratio) from greatest likelihood to least according to models with global dataset including breed, continent, and year variables

| <b>Rank</b> | <b>LRM for affected Genotype</b> | <b>LRM p-value</b> | <b>MRM for affected Genotype</b> | <b>MRM affected SE</b> | <b>MRM for carrier Genotype</b> | <b>MRM carrier SE</b> |
|-------------|----------------------------------|--------------------|----------------------------------|------------------------|---------------------------------|-----------------------|
| 1           | South America                    | 0.9681             | South America                    | 7.988e-04              | Antarctica                      | 4.866e-08             |
| 2           | Asia <sup>1</sup>                | 0.9694             | Asia                             | 5.587e-05              | South America                   | 1.002e-03             |
| 3           | Oceania <sup>1</sup>             | 0.9694             | Oceania                          | 6.098e-04              | North America                   | 1.387e-02             |
| 4           | Europe                           | 0.9704             | Europe                           | 2.931e-02              | Asia                            | 8.506e-05             |
| 5           | North America                    | 0.9722             | North America                    | 2.841e-02              | Europe                          | 1.488e-02             |
| 6           | Africa*                          | 0.9792             | Africa*                          | 4.916e-06              | Oceania                         | 1.017e-03             |
| 7           | Antarctica                       | 0.9984             | Antarctica                       | 5.226e-13              | Africa*                         | 2.065e-05             |

LRM = logistic regression model, MRM = multinomial regression model, SE = standard error

\*Intercept in regression equation

<sup>1</sup>Asia and Oceania had same relative estimate of log-odds, as well as identical p-values

Table S23. Lay public summary table of overall prcd-PRA genotype and allele frequencies and allele frequency trend direction. This does not reflect the range of sample size across time or the magnitude of trend.

| <b>Breed/Mix</b>                  | <b>affected<br/>freq</b> | <b>carrier<br/>freq</b> | <b>allele freq</b> | <b>Allele freq<br/>trend</b> |
|-----------------------------------|--------------------------|-------------------------|--------------------|------------------------------|
| American Eskimo Dog               | 0.088615                 | 0.507629                | 0.34243            | Decrease                     |
| American Hairless (Rat) Terrier   | 0                        | 0                       | 0                  | -                            |
| Australian Cattle Dog             | 0.065298                 | 0.435756                | 0.283175           | Decrease                     |
| Australian Cobberdog              | 0                        | 0                       | 0                  | -                            |
| Australian Shepherd               | 0.001834                 | 0.03423                 | 0.018949           | Decrease                     |
| Australian Shepherd, Miniature    | 0.042194                 | 0.316456                | 0.200422           | Decrease                     |
| Australian Shepherd, Toy          | 0.026316                 | 0.381579                | 0.217105           | Decrease                     |
| Australian Stumpy Tail Cattle Dog | 0.118644                 | 0.322034                | 0.279661           | Increase                     |
| Barbet                            | 0.095238                 | 0.142857                | 0.166667           | Decrease                     |
| Black Russian Terrier             | 0                        | 0                       | 0                  | -                            |
| Bolognese                         | 0.027778                 | 0.25                    | 0.152778           | Decrease                     |
| Bolonka Zwetna                    | 0                        | 0.169811                | 0.084906           | Decrease                     |
| Border Collie                     | 0                        | 0                       | 0                  | -                            |
| Boykin Spaniel                    | 0                        | 0                       | 0                  | -                            |
| Chesapeake Bay Retriever          | 0.016848                 | 0.328048                | 0.180872           | Increase                     |
| Chihuahua                         | 0                        | 0                       | 0                  | Consistent                   |
| Chinese Crested                   | 0.008677                 | 0.125271                | 0.071312           | Decrease                     |
| Cockapoo                          | 0.046025                 | 0.23431                 | 0.16318            | Decrease                     |
| Cocker Spaniel (American)         | 0.033133                 | 0.185241                | 0.125753           | Decrease                     |
| Coton de Tulear                   | 0                        | 0.2                     | 0.1                | Decrease                     |
| Dwarf Poodle                      | 0.007937                 | 0.314059                | 0.164966           | Decrease                     |
| English Cocker Spaniel            | 0.053728                 | 0.366667                | 0.237061           | Decrease                     |
| English Shepherd                  | 0                        | 0                       | 0                  | Consistent                   |
| Entlebucher Mountain Dog          | 0.077944                 | 0.443615                | 0.299751           | Decrease                     |
| FamCollie                         | 0                        | 0                       | 0                  | Consistent                   |
| Field Spaniel                     | 0                        | 0                       | 0                  | -                            |
| Finnish Lapphund                  | 0.019092                 | 0.326109                | 0.182147           | Decrease                     |
| German Spitz                      | 0                        | 0                       | 0                  | Consistent                   |
| Giant Schnauzer                   | 0.018692                 | 0.233645                | 0.135514           | Decrease                     |
| Golden Retriever                  | 0.002075                 | 0.113904                | 0.059027           | Decrease                     |
| Goldendoodle                      | 0.003817                 | 0.183206                | 0.09542            | Decrease                     |
| Karelian Bear Dog                 | 0.222222                 | 0.444444                | 0.444444           | Decrease                     |
| Kuvasz                            | 0.050847                 | 0.397363                | 0.249529           | Decrease                     |
| Lab/Golden Cross                  | 0.013423                 | 0.161074                | 0.09396            | Increase                     |
| Labradoodle                       | 0.02069                  | 0.240394                | 0.140887           | Decrease                     |
| Labradoodle Goldendoodle Cross    | 0                        | 0                       | 0                  | Consistent                   |
| Labradoodle, Australian           | 0.006037                 | 0.334248                | 0.173161           | Decrease                     |
| Labrador Retriever                | 0.016823                 | 0.230006                | 0.131826           | Decrease                     |
| Lagotto Romagnolo                 | 0                        | 0                       | 0                  | -                            |
| Lapponian Herder                  | 0.021622                 | 0.194595                | 0.118919           | Increase                     |
| Maltipoo                          | 0                        | 0                       | 0                  | Consistent                   |



|                                    |          |          |          |            |
|------------------------------------|----------|----------|----------|------------|
| Markiesje                          | 0        | 0        | 0        | -          |
| Miniature American Shepherd        | 0.008696 | 0.243478 | 0.130435 | Decrease   |
| Miniature Poodle                   | 0.0158   | 0.256941 | 0.144271 | Decrease   |
| Mixed Breed                        | 0        | 0        | 0        | Consistent |
| Moyen Poodle (Klein Poodle)        | 0        | 0.235955 | 0.117978 | Decrease   |
| Norwegian Elkhound                 | 0        | 0.359091 | 0.179545 | Decrease   |
| Nova Scotia Duck Tolling Retriever | 0.01762  | 0.446778 | 0.241009 | Decrease   |
| Pomeranian                         | 0        | 0        | 0        | -          |
| Portuguese Water Dog               | 0.009322 | 0.25572  | 0.137182 | Decrease   |
| Rat Terrier                        | 0        | 0        | 0        | -          |
| Schipperke                         | 0        | 0.1      | 0.05     | Increase   |
| Shetland Sheepdog                  | 0        | 0        | 0        | -          |
| Silky Terrier                      | 0        | 0.103448 | 0.051724 | Decrease   |
| Spanish Water Dog                  | 0.022164 | 0.29987  | 0.172099 | Increase   |
| Sprocker Spaniel                   | 0        | 0        | 0        | Consistent |
| Standard Poodle                    | 0.005747 | 0.08046  | 0.045977 | Decrease   |
| Swedish Lapphund                   | 0.075456 | 0.524046 | 0.337479 | Decrease   |
| Tibetan Terrier                    | 0        | 0        | 0        | -          |
| Toy Poodle                         | 0.023283 | 0.274803 | 0.160685 | Decrease   |
| Yorkshire Terrier                  | 0.025237 | 0.170347 | 0.11041  | Increase   |

-only one data point, not enough data to determine a trend

Table S24. Lay public summary table of overall CEA genotype and allele frequencies and allele frequency trend direction. This does not reflect the range of sample size across time or the magnitude of trend.

| <b>Breed/Mix</b>                   | <b>affected freq</b> | <b>carrier freq</b> | <b>allele freq</b> | <b>Allele freq trend</b> |
|------------------------------------|----------------------|---------------------|--------------------|--------------------------|
| Australian Shepherd                | 0.010201             | 0.164142            | 0.092272           | Increase                 |
| Australian Shepherd, Miniature     | 0                    | 0.005102            | 0.002551           | Decrease                 |
| Australian Shepherd, Toy           | 0                    | 0                   | 0                  | Consistent               |
| Bearded Collie                     | 0.005634             | 0.08169             | 0.046479           | Decrease                 |
| Berger d'Auvergne                  | 0                    | 0.444444            | 0.222222           | Increase                 |
| Border Collie                      | 0.013107             | 0.280451            | 0.153333           | Decrease                 |
| Boykin Spaniel                     | 0.05988              | 0.407186            | 0.263473           | Increase                 |
| Collie                             | 0.249843             | 0.438326            | 0.469006           | Increase                 |
| English Shepherd                   | 0                    | 0.2                 | 0.1                | Increase                 |
| Hokkaido dog                       | 0.444444             | 0.444444            | 0.666667           | Decrease                 |
| Labrador Retriever                 | 0                    | 0                   | 0                  | -                        |
| Lancashire Heeler                  | 0.003704             | 0.248148            | 0.127778           | Decrease                 |
| Miniature American Shepherd        | 0                    | 0.027027            | 0.013514           | Increase                 |
| Miniature Poodle                   | 0                    | 0                   | 0                  | -                        |
| Mixed Breed                        | 0                    | 0                   | 0                  | -                        |
| Nova Scotia Duck Tolling Retriever | 0.004516             | 0.197455            | 0.103243           | Decrease                 |
| Shetland Sheepdog                  | 0.098849             | 0.422139            | 0.309919           | Decrease                 |
| Silken Windhound                   | 0.059322             | 0.338983            | 0.228814           | Increase                 |
| Whippet, Longhaired                | 0.075472             | 0.528302            | 0.339623           | Decrease                 |

-only one data point, not enough data to determine a trend
